# Supplementary material for: Knowledge, attitudes and preferences regarding genetic testing for smoking cessation. A cross-sectional survey among Dutch smokers
Source: PubMed Central journal article supplement — BMJ Open. 2012 Jan 5;2(1):e000321. doi: 10.1136/bmjopen-2011-000321 (PMC3253420; doi:10.1136/bmjopen-2011-000321), 2012-01-05
Supplement: bmjopen-2011-000321-s2.pdf [file bmjopen-2011-000321-s2.pdf]

## SUPPLEMENTARY TABLES

**Table S1: Perceptions of the probability and seriousness of genetic factors influencing smoking addiction and cessation**

|                                                                                                               | <i>probability</i>  |                |                   | <i>seriousness</i>              |                |                       |
|---------------------------------------------------------------------------------------------------------------|---------------------|----------------|-------------------|---------------------------------|----------------|-----------------------|
|                                                                                                               | <i>(very) small</i> | <i>average</i> | <i>(very) big</i> | <i>(completely) not serious</i> | <i>neutral</i> | <i>(very) serious</i> |
| ...that you have a genetic predisposition as a result of which you will have more difficulty to stop smoking. | 38.3%               | 44.8%          | 16.8%             | 10.6%                           | 35.6%          | 53.9%                 |
| ...that you have a genetic predisposition as a result of which you have more withdrawal symptoms.             | 39.4%               | 45.3%          | 15.3%             | 9.4%                            | 39.2%          | 51.5%                 |

**Table S2: Intention to undergo genetic testing**

|                                                                                                        | <i>(completely) not interested</i> | <i>undecided</i> | <i>(completely) interested</i> |
|--------------------------------------------------------------------------------------------------------|------------------------------------|------------------|--------------------------------|
| I am planning to undergo a genetic test to determine which smoking cessation therapy I could use best. | 43.5%                              | 40.0%            | 16.6%                          |
| I am planning to undergo a genetic test if my GP would offer it.                                       | 29.8%                              | 31.9%            | 38.3%                          |
| I am planning to ask my GP to undergo a genetic test.                                                  | 50.6%                              | 41.6%            | 7.8%                           |
