# Supplementary material for: Knowledge, attitudes and preferences regarding genetic testing for smoking cessation. A cross-sectional survey among Dutch smokers
Source: PubMed Central journal article supplement — BMJ Open. 2012 Jan 5;2(1):e000321. doi: 10.1136/bmjopen-2011-000321 (PMC3253420; doi:10.1136/bmjopen-2011-000321), 2012-01-05
Supplement: bmjopen-2011-000321.draft_revisions.pdf [file bmjopen-2011-000321.draft_revisions.pdf]

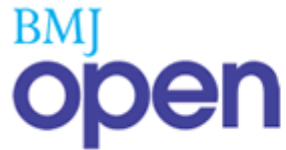

**Knowledge, attitudes, and preferences regarding genetic testing for smoking cessation.  
A cross-sectional survey among Dutch smokers.**

|                                 |                                                                                                                                                                                                                                                                                                                                                                                                                                                                                                                                                                                                                                                                                                     |
|---------------------------------|-----------------------------------------------------------------------------------------------------------------------------------------------------------------------------------------------------------------------------------------------------------------------------------------------------------------------------------------------------------------------------------------------------------------------------------------------------------------------------------------------------------------------------------------------------------------------------------------------------------------------------------------------------------------------------------------------------|
| Journal:                        | <i>BMJ Open</i>                                                                                                                                                                                                                                                                                                                                                                                                                                                                                                                                                                                                                                                                                     |
| Manuscript ID:                  | bmjopen-2011-000321                                                                                                                                                                                                                                                                                                                                                                                                                                                                                                                                                                                                                                                                                 |
| Article Type:                   | Research                                                                                                                                                                                                                                                                                                                                                                                                                                                                                                                                                                                                                                                                                            |
| Date Submitted by the Author:   | 18-Aug-2011                                                                                                                                                                                                                                                                                                                                                                                                                                                                                                                                                                                                                                                                                         |
| Complete List of Authors:       | Quaak, Marieke; Nutrition and Toxicology Research Institute Maastricht (NUTRIM), Maastricht University, Toxicology; Care and Public Health Research Institute (CAPHRI), Maastricht University, General Practice<br>Smerecnik, Chris; Care and Public Health Research Institute (CAPHRI), Maastricht University, Health Promotion<br>van Schooten, Frederik; Nutrition and Toxicology Research Institute Maastricht (NUTRIM), Maastricht University, Toxicology<br>de Vries, Hein; Care and Public Health Research Institute (CAPHRI), Maastricht University, Health Promotion<br>van Schayck, Constant; Care and Public Health Research Institute (CAPHRI), Maastricht University, General Practice |
| <b>Primary Subject Heading</b>: | Smoking & tobacco                                                                                                                                                                                                                                                                                                                                                                                                                                                                                                                                                                                                                                                                                   |
| Keywords:                       | nicotine, cessation, GENETICS, public opinion                                                                                                                                                                                                                                                                                                                                                                                                                                                                                                                                                                                                                                                       |
|                                 |                                                                                                                                                                                                                                                                                                                                                                                                                                                                                                                                                                                                                                                                                                     |

SCHOLARONE™  
Manuscripts

# Knowledge, attitudes, and preferences regarding genetic testing for smoking cessation.

## A cross-sectional survey among Dutch smokers.

Marieke Quaak<sup>1,2</sup>

Chris Smerecnik<sup>3</sup>

Frederik J. van Schooten<sup>1</sup>

Hein de Vries<sup>3</sup>

Constant P. van Schayck<sup>2</sup>

<sup>1</sup> Department of Toxicology, Nutrition and Toxicology Research Institute Maastricht (NUTRIM), Maastricht University, Maastricht, the Netherlands;

<sup>2</sup> Department of General Practice, Care and Public Health Research Institute (CAPHRI), Maastricht University, Maastricht, the Netherlands;

<sup>3</sup> Department of Health Promotion, Care and Public Health Research Institute (CAPHRI), Maastricht University, Maastricht, the Netherlands

**Keywords:** nicotine dependence – smoking cessation – (pharmaco)genetic testing – knowledge – attitudes – preferences

**Address correspondence to:**

M. Quaak

Department of Toxicology

Nutrition and Toxicology Research Institute Maastricht (NUTRIM)

Maastricht University

P.O. Box 616, 6200 MD Maastricht, The Netherlands

E-mail: [m.quaak@maastrichtuniversity.nl](mailto:m.quaak@maastrichtuniversity.nl), Phone: +31 43 3881088, Fax: +31 43 3884146

**ABSTRACT**

**Introduction** Recent research strongly suggests that genetic variation influences smokers' ability to stop. Therefore, the use of (pharmaco)genetic testing may increase cessation rates. This study aims to assess the intention of smokers concerning undergoing genetic testing for smoking cessation, and their knowledge, attitudes and preferences about this subject.

Deleted: addiction and

**Methods:** Smokers' knowledge, attitudes, and preferences and their intention to undergo genetic testing were assessed using an online cross-sectional survey among 587 Dutch smokers.

**Results:** Knowledge on the influence of genetic factors in smoking addiction and cessation were found to be low. Smokers underestimated their chances of having a genetic predisposition and the influence of this on smoking cessation. Participants perceived few disadvantages, some advantages, and showed moderate self-efficacy towards undergoing a genetic test and dealing with the results. Smokers were mildly interested in receiving information and participating in genetic testing, especially when offered by their GP.

**Conclusions:** For successful implementation of genetic testing for smoking in general practice, several issues should be addressed, such as the knowledge on smoking cessation, genetics and genetic testing (including advantages and disadvantages), and the influence of genetics on smoking addiction and cessation. Furthermore, smokers allocate their GPs a crucial role in the provision of information and the delivery of a genetic test for smoking; however it is unclear whether GPs will be able and willing to take on this role.

**ARTICLE SUMMARY:****Article focus:**

- Intention of smokers to undergo genetic testing for smoking cessation.
- Smokers' knowledge, attitudes and preferences regarding genetic testing for smoking.
- To aid decisions on the most appropriate strategies for counseling patients and communicating their test results with regard to a genetic test for smoking.

**Key messages:**

- Smokers are mildly interested in receiving more information and participating in genetic testing for smoking cessation, especially when offered by their GP.
- Knowledge on smoking cessation, genetics and genetic testing (including advantages and disadvantages), and the influence of genetics on smoking cessation is low.

**Strengths and limitations:**

- This study provides valuable information on the needs and attitudes of smokers regarding genetic testing for smoking cessation, which can aid decisions for future implementation.
- Limitations:
  - Underrepresentation smokers intending to stop smoking might have led to an underestimation of smokers interested in genetic testing.
  - Low knowledge level on genetic testing for smoking cessation and genetics in general might have influenced participants' ability to answer the questions.
  - Interest in undergoing genetic testing may reflect a generally positive attitude towards genetic testing rather than actual uptake.
  - Selection bias might have occurred, due to the non-representative nature of the internet population and the self-selection of participants (volunteer effect); however unlikely due to high response rate (83%).

## INTRODUCTION

With currently still over 1.2 billion smokers world-wide, tobacco smoking continues to be the largest preventable cause of disease and premature death [1-3]. Cessation reverses most adverse effects of smoking [4]. Although most smokers are highly motivated to quit, and many (pharmacological) treatments are available to help them, cessation rates remain low; the average 12-month success rate ranges from 15 to 30% [5], but substantial variability exists in success rates across smokers. Therefore, multiple quit attempts are often required.

Recent research strongly suggests that smokers vary in their underlying genetic susceptibility to become addicted to smoking and their ability to stop smoking [5-8]. Genetic variation may also influence a smoker's response to a particular smoking cessation pharmacotherapy. Hence, overall effectiveness of smoking cessation pharmacotherapy may potentially be increased if it will be targeted at smokers most likely to respond to a particular type of pharmacotherapy. Reviews concerning preliminary findings of studies investigating the effect of genetic polymorphisms on smoking cessation suggest promising effects [5, 9, 10], making the use of (pharmaco)genetic testing for smoking in clinical practice for increasing quit rates by genetically-tailored smoking cessation treatment in the near future more likely.

Future implementation of (pharmaco)genetic testing for smoking in daily medical practice, however, will ultimately depend upon smokers' acceptance of these tests. At present there is relatively little knowledge about the willingness and preferences of smokers concerning genetic testing for smoking addiction and cessation, and about individuals' knowledge and attitudes on this subject.

The goal of this study, therefore, is to investigate the intention of smokers to undergo genetic testing for smoking cessation, and their knowledge, risk perceptions, attitudes, and self-efficacy beliefs. Additionally, we assessed their preferences concerning a genetic test for smoking cessation, such as topics and channels of interest, and test characteristics. This information can be used to guide the future development of a (pharmaco)genetic test for smoking cessation.

## METHODS

### Study design

Smokers' knowledge, attitudes, and preferences and their intention to undergo genetic testing were assessed using an online cross-sectional survey.

### Recruitment

Participants were selected from the database of an internet research company originating from Maastricht University (Flycatcher Internet Research B.V., Maastricht, The Netherlands). The company has a database of ~20.000 members from which representative samples can be drawn. Every inhabitant of the Netherlands of  $\geq 12$  years with an e-mail address and capable of understanding Dutch can become a member. Members are recruited via digital media, written invitations, face-to-face contacts, and intermediaries. Since 2009 the panel is certified with a quality mark (ISO-26326).

Participants were eligible for inclusion if they were aged  $\geq 18$  years, were daily smokers for  $\geq 5$  years and smoked on average  $\geq 10$  cigarettes/day. In total, 711 participants that met the inclusion criteria were approached for this study. Two e-mails could not be delivered. Of the remaining invitations, 614 people responded. However, 26 questionnaires were not completely filled out and one case was removed because the fill out time indicated that this participant could not have read the questions before answering. Thus, a total of 587 participants were included in the present study (response rate = 83%).

### Questionnaire

The questionnaire was conducted in Dutch (questions in manuscript translated by authors) and took about 30 minutes to complete. Respondents were compensated for their time according to the standard of the research company (e.g. respondents receive a number of points which can be exchanged for a gift-certificate when a certain amount is reached).

#### *Participant characteristics*

Participants' age, gender, and education level were available from the company. In addition, participants were asked questions regarding their smoking behavior (type of tobacco product, number of cigarettes and/or shags per day, level of nicotine dependence (assessed by the Fagerström Test for Nicotine Dependence [FTND] [11]), previous quit attempts (number, duration, period until last attempt), and intention and intended period to quit.

### *Knowledge*

Knowledge was assessed using ten statements (see *Table 2*); two regarding smoking cessation in general, four regarding the influence of genetics on nicotine dependence, and four regarding the influence of genetics on smoking cessation (treatment). Participants were asked whether they agreed or disagreed with the statements, or did not know the answer. In addition, participants were asked how important environment, personal behavior and genetic predisposition were according to them as a cause for smoking.

### *Risk perceptions*

Participants were requested to estimate their probability that they have a genetic predisposition as a result of which they will have more difficulty to stop smoking, or they will experience more withdrawal symptoms (1: *very small* – 5: *very high*), as well as to indicate the seriousness of this (1: *completely not serious* – 5: *very serious*).

### *Attitudes and self-efficacy beliefs*

Attitudes towards undergoing genetic testing were assessed by 10 questions on the perceived advantages and 10 questions on the disadvantages, and self-efficacy (e.g. ability to undergo a genetic test and to deal with the results) using 4 questions (1: *completely disagree* – 5: *completely agree*; see *Table 3*).

### *Topics and channels of interest*

Participants were asked about which of the given topics they would like to receive more information, via which channels they would prefer to receive more information regarding a genetic test to help them stop smoking, and via which channels they would prefer to actually obtain the test.

### *Test characteristics*

Participants were asked how important a number of test characteristics (easily performable, reliability, fast result, sharp increased cessation rates, low price, covered by insurance) were for them when they would consider to undergo a genetic test to help them stop smoking (1: *very unimportant* – 5: *very important*). Further, participants were asked which maximum price they would be willing to pay for the genetic test.

### *Intention to undergo genetic testing*

Participants were asked if they were planning to undergo a genetic test to determine which smoking cessation therapy they could use best, and if they were planning to undergo a genetic test if it was offered by their general practitioner (GP), or if they would ask their GP for a genetic test (1: *strongly disagree* – 5: *strongly agree*).

## RESULTS

### Participant characteristics

Participant characteristics and characteristics of the general Dutch smoking population can be found in *Table 1*. No significant differences were found in terms of gender, age-group, education level, amount of cigarette smokers, and number of cigarettes smoked. Slightly more participants had attempted to quit smoking and they had undertaken slightly more quit attempts. A larger part of the sample smoked shag (rolling tobacco), but fewer smoked pipe/cigar/cigarillo's. Furthermore, participants seemed less interested in quitting than the general smoking population.

**Table 1: Baseline characteristics of the research sample (compared to the general smoking population)**

|                                                    | sample (n=587) |        |        | Dutch smoking population <sup>a</sup> |
|----------------------------------------------------|----------------|--------|--------|---------------------------------------|
|                                                    | No. / mean     | % / SD | range  |                                       |
| <b>Demographics</b>                                |                |        |        |                                       |
| Gender (No., %)                                    |                |        |        |                                       |
| male                                               | 292            | 49.7   |        | 53.6%                                 |
| female                                             | 295            | 50.3   |        | 46.4%                                 |
| Age (No., %)                                       |                |        |        |                                       |
| 20-39 years                                        | 192            | 32.7   |        | 41.0%                                 |
| 40-64 years                                        | 336            | 57.2   |        | 50.7%                                 |
| >65 years                                          | 59             | 10.1   |        | 8.3%                                  |
| Level of education (No., %)                        |                |        |        |                                       |
| low                                                | 184            | 31.3   |        | 39.0%                                 |
| medium                                             | 267            | 45.5   |        | 36.6%                                 |
| high                                               | 136            | 23.2   |        | 24.4%                                 |
| <b>Smoking characteristics</b>                     |                |        |        |                                       |
| Type of tobacco product smoked (No., %)            |                |        |        |                                       |
| Cigarettes                                         | 430            | 73.3   |        | 67.0%                                 |
| Shag (rolling tobacco)                             | 360            | 61.3   |        | 48.0%                                 |
| Pipe/cigars/cigarillo's                            | 28             | 4.8    |        | 17.0%                                 |
| Other                                              | 5              | 0.8    |        | -                                     |
| No. of cigarettes/shags smoked per day (mean, SD)  | 19.0           | 7.5    | 10-50  | 14.4                                  |
| FTND score (mean, SD)                              | 4.6            | 2.1    | 0-10   | -                                     |
| FTND score >6 (No., %)                             | 215            | 36.6   |        | -                                     |
| <b>Cessation characteristics</b>                   |                |        |        |                                       |
| Previously attempted to quit (No., %)              | 437            | 74.4   |        | 65.0%                                 |
| No. of previous attempts to quit (mean, SD)        | 2.9            | 3.1    | 1-40   | 2.2                                   |
| Duration longest quit attempt, days (mean, SD)     | 269.7          | 623.1  | 0-4015 | -                                     |
| Period until last quit attempt, years (mean, SD)   | 3.9            | 5.1    | 0-30   | -                                     |
| Intention to quit smoking (No., %)                 | 305            | 52.0   |        | 78.0%                                 |
| Intended period until quit attempt, years (No., %) |                |        |        |                                       |
| Within 1 month                                     | 22             | 3.7    |        | 11.0%                                 |
| Within 3 months                                    | 53             | 9.0    |        | 13.0%                                 |
| Within 6 months                                    | 50             | 8.5    |        | 14.0%                                 |
| Within 1 year                                      | 109            | 18.6   |        | 40.0%                                 |
| More than 1 year from now                          | 71             | 12.1   |        | -                                     |

<sup>a</sup> TNS Nipo/STIVORO. Continu Onderzoek rookgewoonten (COR) [continuous research smoking habits]. 2009

### Knowledge

*Table 2* presents the percentage of correct, incorrect and "don't know" answers.

The first set of statements concerned respondents' knowledge about smoking cessation. Overall, 88.9% knew that it is important to quit. About half (49.1%) of the respondents knew that less than half of the smokers who want to quit succeed, while 29.8% could not answer this question.



The second set measured whether respondents were aware of how genetic factors influence smoking addiction levels. About half of the participants could not answer these questions (42.6-59.6%). The lowest percentage of correct scores were found for the statements regarding the transfer of a genetic predisposition to the offspring by a non-smoking parent, and the existence of genes that decrease the chance of becoming addicted to smoking (14.0% and 15.5%, respectively). About one-third knew that the chance to become addicted to smoking is influenced by genes (29.5%), and that genes exist that increase the chance of becoming addicted to smoking (33.4%).

The third set assessed knowledge of the influence of genetic factors on smoking cessation and smoking cessation treatment. More than half of the respondents could not answer these (53.5-60.3%). About a quarter knew that a genetic predisposition might also influence ones chances to quit (25.4%), can make cessation therapy less effective for certain smokers (26.4%), and influences the chance on withdrawal symptoms during cessation (23.9%). Only 15.2% knew that a genetic predisposition can also make a cessation therapy more effective for certain smokers.

**Table 2: Knowledge of smoking cessation, and influence of genetic factors on smoking addiction and smoking cessation (treatment)**

|                                                                                                                                                                                  | <i>correct</i> | <i>incorrect</i> | <i>don't know</i> |
|----------------------------------------------------------------------------------------------------------------------------------------------------------------------------------|----------------|------------------|-------------------|
| <b><i>Smoking cessation</i></b>                                                                                                                                                  |                |                  |                   |
| It is important to quit smoking, even if you already smoke for a very long time. (T)                                                                                             | 88.9%          | 4.3%             | 6.8%              |
| More than half of the smokers who want to quit smoking succeed in quitting. (F)                                                                                                  | 49.1%          | 21.1%            | 29.8%             |
| <b><i>Influence of genetic factors on smoking addiction levels</i></b>                                                                                                           |                |                  |                   |
| The chance to become addicted to smoking is influenced by the presence of certain hereditary traits (genes). (T)                                                                 | 29.5%          | 27.9%            | 42.6%             |
| Genes exist that increase the chance to become addicted to smoking. (T)                                                                                                          | 33.4%          | 15.5%            | 51.1%             |
| Genes exist that decrease the chance to become addicted to smoking. (T)                                                                                                          | 15.5%          | 24.9%            | 59.6%             |
| A parent with a genetic predisposition to get addicted to smoking will transfer this predisposition to its children, even when the parent doesn't smoke or has never smoked. (T) | 14.0%          | 33.2%            | 52.8%             |
| <b><i>Influence of genetic factors on smoking cessation (treatment)</i></b>                                                                                                      |                |                  |                   |
| A genetic predisposition to get addicted to smoking might also influence ones chance to quit smoking. (T)                                                                        | 25.4%          | 21.1%            | 53.5%             |
| Due to a genetic predisposition can a smoking cessation therapy (e.g. nicotine patches) be less effective for certain smokers. (T)                                               | 26.4%          | 17.6%            | 56.0%             |
| Due to a genetic predisposition can a smoking cessation therapy (e.g. nicotine patches) be more effective for certain smokers. (T)                                               | 15.2%          | 24.5%            | 60.3%             |
| A genetic predisposition can influence the chance on withdrawal symptoms during a cessation attempt. (T)                                                                         | 23.9%          | 18.7%            | 57.4%             |

Furthermore, most respondents believed that environment and personal behavior were (very) important causes for smoking (80% and 84%, respectively), while only 36% believed that genetic predisposition is a (very) important cause of smoking (*Figure S1*).

### Risk perceptions

About one-third of the participants believed their probability to be (very) small to have a genetic predisposition as a result of which they will have more difficulty to stop smoking (38.3%), or have more withdrawal symptoms (39.4%) (*Table S1*). On the other hand, about one-fifth (16.8%, and 15.3%, respectively) believed their probability to be (very) big.

About half of the participants believed this to be (very) serious (53.9% and 51.5%), about two-fifth (35.6 and 39.2%) to be neutral, and about one-tenth (9.4 and 10.6%) to be (completely) not serious (*Table S1*).

### Attitudes and self-efficacy beliefs

Attitudes regarding genetic testing (perceived advantages and disadvantages), and self-efficacy beliefs can be found in *Table 3*.

About one-third to half of the participants did not agree with the statements about the disadvantages of genetic testing, about one-third to two-fifth had a neutral reaction, while only less than one-third (completely) agreed with these statements. Especially the chance that the results would become known at work or to the employer and that they would not be able to tell others was perceived as low (4.8% and 8.0% (completely) agreed, respectively).

On the other hand, only about one-third or less (completely) disagreed with the statements on the advantages of genetic testing (12.8-34.2%), while about half (43.1-61.0%) had a neutral reaction and 12.8-33.2% (completely) agreed. Participants were least convinced that they would be relieved by the results and most convinced that a genetic test would give a reliable result about the presence of a genetic predisposition to become addicted to smoking, and that it could help to determine the correct dose of smoking cessation medication.

About a quarter of the participants were unsure if they would be able to ask their GP for a genetic test or undergo a genetic test (27.6% and 25.7%, respectively), while about two-fifth (39.7% and 38.0%) had a neutral reaction, and one-third (32.7% and 36.3%) (totally) agreed with these statements. Further, they agreed even somewhat more to the beliefs that they would be able to undergo the correct treatment based on the results of the test, and to understand the results of the genetic test. Only, about 10-15% (totally) disagreed with these statements, about half (48.9% and 49.2%, respectively) did not agree or disagree with them and about two-fifth (39.9% and 35.6%) (totally) agreed with them.

Table 3: Attitudes and self-efficacy beliefs

|                                                                                                                  | completely disagree | disagree | neutral | agree | completely agree |
|------------------------------------------------------------------------------------------------------------------|---------------------|----------|---------|-------|------------------|
| <b>Disadvantages</b>                                                                                             |                     |          |         |       |                  |
| If I would undergo a genetic test...                                                                             |                     |          |         |       |                  |
| ...the results will become known at my work / to my employer.                                                    | 39.9%               | 29.3%    | 26.1%   | 3.9%  | 0.9%             |
| ...the results will become known to my health insurance.                                                         | 23.7%               | 20.6%    | 33.2%   | 18.9% | 3.6%             |
| ...and it will show that I am addicted to smoking will it be more difficult to get a mortgage or life-insurance. | 19.4%               | 22.1%    | 32.7%   | 19.9% | 5.8%             |
| ...the results may be passed on to all kinds of agencies.                                                        | 21.8%               | 26.6%    | 34.6%   | 12.9% | 4.1%             |
| ...I will learn about other diseases I have a predisposition for.                                                | 11.8%               | 15.5%    | 43.3%   | 26.1% | 3.4%             |
| ...I will be worried for the results.                                                                            | 9.0%                | 24.7%    | 40.4%   | 23.2% | 2.7%             |
| ...I will be afraid of the results.                                                                              | 10.9%               | 27.4%    | 42.2%   | 16.5% | 2.9%             |
| ...I will regret it due to possible consequences.                                                                | 10.4%               | 27.9%    | 44.5%   | 14.8% | 2.4%             |
| ...I will worry about the possible results of the genetic test.                                                  | 9.7%                | 22.7%    | 40.0%   | 23.9% | 3.7%             |
| ...I will not be able to tell the results to others.                                                             | 15.0%               | 38.2%    | 38.8%   | 6.6%  | 1.4%             |
| <b>Advantages</b>                                                                                                |                     |          |         |       |                  |
| If I would undergo a genetic test...                                                                             |                     |          |         |       |                  |
| ...this will indicate the correct smoking cessation therapy for me.                                              | 4.6%                | 13.5%    | 55.5%   | 21.5% | 4.9%             |
| ...this will increase the chances that I succeed to stop smoking.                                                | 6.1%                | 13.8%    | 54.9%   | 20.6% | 4.6%             |
| ...this will help to determine the correct dose of smoking cessation medication.                                 | 5.1%                | 10.6%    | 51.4%   | 27.8% | 5.1%             |
| ...I will have less side-effects from smoking cessation treatments.                                              | 6.0%                | 16.5%    | 61.0%   | 13.5% | 3.1%             |
| ...this can prevent that I take/undergo an incorrect smoking cessation treatment.                                | 5.5%                | 11.1%    | 56.4%   | 22.0% | 5.1%             |
| ...I will feel better since I know I have done everything I can to understand my smoking addiction.              | 12.6%               | 21.6%    | 50.3%   | 14.1% | 1.4%             |
| ...I will feel relieved by the results.                                                                          | 7.8%                | 15.8%    | 43.1%   | 29.5% | 3.7%             |
| ...I will be proud of myself.                                                                                    | 9.0%                | 21.3%    | 52.5%   | 14.8% | 2.4%             |
| ...I will be happy that I know my genetic risk.                                                                  | 9.5%                | 19.9%    | 45.5%   | 21.3% | 3.7%             |
| ...I will feel reassured.                                                                                        | 12.6%               | 21.6%    | 50.3%   | 14.1% | 1.4%             |
| <b>Self-efficacy</b>                                                                                             |                     |          |         |       |                  |
| Do you believe you will be able to...                                                                            |                     |          |         |       |                  |
| ...undergo a genetic test?                                                                                       | 7.5%                | 18.2%    | 38.0%   | 20.3% | 16.0%            |
| ...ask you GP for a genetic test when you have a need for it?                                                    | 7.2%                | 20.4%    | 39.7%   | 20.1% | 12.6%            |
| ...understand the results of the genetic test?                                                                   | 3.2%                | 8.0%     | 48.9%   | 27.3% | 12.6%            |
| ...undergo the correct treatment based on the results of the genetic test?                                       | 4.6%                | 10.6%    | 49.2%   | 17.5% | 18.1%            |

### Topics and channels of interest

About one-third of the participants (29.3%) were not interested in more information (see *Figure S2-A*). However, 28.4% were interested in more information on how DNA works, 35.8% in what a genetic predisposition is, and 50.9% in the working mechanism of a genetic test. Further, 42.9% were interested in where more information can be found about the genetic background of smoking, and 43.1% in more information about the influence of genetic differences on (smoking cessation) treatments.

Most participants (73.6%) would prefer to receive more information from their GP (*Figure S2-B*). Other channels via which participants would prefer to receive more information are the internet (48.0%), specialists (37.6%), leaflets (22.5%), TV (12.4%), newspapers (7.7%), friends (6.0%), a telephonic helpdesk (5.3%), magazines (4.9%), radio (2.4%), and books (2.2%).

1 Most participants (67.6%) would also prefer to obtain the genetic test via their GP (*Figure S2-C*).  
2  
3 Other preferred channels for obtaining the test were expert/specialist (33.4%), the pharmacy (18.1%),  
4 internet (15.5%), and the pharmacist (9.2%), while 15.5% was not interested in obtaining a genetic test.  
5  
6

### 7 **Test characteristics**

8 The most important test characteristic according to the participants of this study is reliability (*Figure S3*);  
9 82% of the participants believed this to be (very) important. Other test characteristics were also indicated  
10 as (very) important by most participants; covered by insurance (78%), a low price (74%), a sharp increase  
11 in cessation rates (71%), and a fast result (65%).  
12  
13

14  
15 Most participants (64.7%) indicated not to be willing to pay more than €50 for the genetic test. About a  
16 quarter of the participants (24.2%) are willing to pay €50-€150, 8.9% will pay €150-€200, and only 2.2% is  
17 willing to pay more than €200.  
18  
19

### 20 **Intention to undergo genetic testing**

21  
22 Only a low number of participants (16.6%) were (completely) interested in undergoing a genetic test to  
23 determine which smoking cessation therapy they could use best (see *Table S2*). From the remaining  
24 participants, slightly less than half were (completely) not interested in undergoing a genetic test (43.5%)  
25 and about the same proportion was undecided as to whether or not they would be willing to undergo a  
26 genetic test (40.0%).  
27  
28

29  
30 The intention to undergo genetic testing increased considerably when it would be offered by their GP  
31 (38.3%). On the other hand, only 7.8% would ask their GP for the genetic test, while about half of the  
32 participants (50.6%) would not ask their GP for the test.  
33  
34  
35  
36  
37  
38  
39  
40  
41  
42  
43  
44  
45  
46  
47  
48  
49  
50  
51  
52  
53  
54  
55  
56  
57  
58  
59  
60

## DISCUSSION

Significant advances have been made in elucidating the role of genetic factors in nicotine dependence and response to smoking cessation treatment. Although much work still remains to be done, the use of (pharmaco)genetic testing for increasing quit rates by genetically-tailored smoking cessation treatment in clinical practice is on the horizon. However, at present few studies have investigated the needs and attitudes of smokers on this subject. Therefore, in this study we investigated knowledge, attitudes, and preferences of smokers on genetics of smoking, and their willingness to undergo genetic testing for smoking addiction and treatment.

Firstly, the results showed that the knowledge level is low. Even though most smokers knew it is important to quit smoking, only about half of them knew that less than half of the smokers who want to quit smoking will succeed. In practice cessation rates are even much lower; only 15-30% will succeed in long-term quitting using the available treatments [5] and these rates are even lower when no treatment is used. Knowledge levels about the influence of genetic factors on smoking addiction and cessation (treatment) were even much lower. More than half of the participants did not know the answer to (almost all of) these questions, and the number of correct answers varied from only 14.0% to 33.4%. Furthermore, we found that most participants did not believe that a genetic predisposition is a (very) important cause of smoking, while it has been shown that genetic factors account for a vast part of the variance in smoking initiation, maintenance and cessation success [5-8]. These results are comparable with a previous study [12], which also found that smokers, ex-smokers and non-smokers had little knowledge about genetic contributions to smoking and smoking-related behaviours. And also only a small part of the participants (13%) believed that inheriting a gene that predisposes them to smoke is the most important factor that causes people to smoke, although smokers were significantly more likely to agree with this [12].

Secondly, respondents were found to perceive the probability of having a genetic predisposition to be (very) small to average, even though many of the genetic variants that have been shown to influence smoking behavior are prevalent in the population [13, 14]. Another study [12] found that 53% perceived themselves as "*not at all likely*" or "*somewhat likely*" to have inherited a genetic predisposition to smoking, while 47% perceived themselves to be "*moderately*" to "*extremely likely*".

Thirdly, participants were found to perceive little disadvantages of genetic testing for smoking addiction and cessation, but some advantages. Only a small part of the participants in this study were concerned that the results would become known at their work or to their employer, their health insurance or other agencies, and that it would become more difficult to get a mortgage or life-insurance when a

1 genetic test would show that they were addicted to smoking. On the contrary, research in other areas has  
2 shown that those in the USA are particularly concerned about the potential for genetic test results to  
3 become available to their employer, health insurance or life insurance [15, 16]. These differences might be  
4 explained by the difference in laws in place to protect against the misuse of genetic information by  
5 employers and insurers. In some countries genetic testing is explicitly regulated with regard to all aspects  
6 (e.g. Austria, Netherlands and Norway), in others the regulation has focused only on the insurance  
7 industry (e.g. Denmark, and Sweden) or even only on group health insurers (e.g. USA) [17].  
8  
9  
10  
11  
12

13 Fourthly, about one-third to two-fifth believed to be able to undergo a genetic test and to deal with the  
14 results (e.g. self-efficacy), about half had a neutral reaction and only about 10-15% believed not to be able  
15 to do this. However, about a quarter of the participants were unsure if they would be able to ask their GP  
16 for a genetic test or undergo a genetic test (25.7%).  
17  
18

19 Furthermore, the most popular topics for receiving more information were found to be the working  
20 mechanism of a genetic test, where more information about the genetic background of smoking can be  
21 found, and the influence of genetic differences on (smoking cessation) treatments. This confirms the lack  
22 of knowledge about the influence of genetics on smoking and smoking cessation that was found in this  
23 study. Furthermore, about one-third of the participants were also interested in more information on what a  
24 genetic predisposition is and how DNA works, indicating a further lack of knowledge on genetics in  
25 general.  
26  
27  
28  
29

30 Finally, most participants would prefer to obtain more information and the genetic test via their GP.  
31 Thus, it seems likely that GPs will play an important role in the counseling of patients about undergoing  
32 genetic testing.  
33  
34

35 This study is subject to several limitations.  
36  
37

38 Firstly, our sample underrepresented smokers intending to stop smoking, which could have led to an  
39 underestimation of the willingness to undergo genetic testing.  
40  
41

42 Secondly, as smokers may not be familiar with genetic testing for smoking addiction and genetically-  
43 tailored cessation treatments, or even genetics in general, it is questionable whether they were able to  
44 give a well-considered answer to all our questions.  
45  
46

47 Thirdly, as Sanderson and colleagues argued [18], interest in undergoing genetic testing may reflect a  
48 generally positive attitude towards genetic testing rather than actual uptake. Thus, to determine actual  
49  
50  
51  
52  
53  
54  
55  
56  
57  
58  
59  
60

1 uptake of genetic testing further studies are needed were respondents are offered the possibility to  
2 undergo genetic testing.  
3

4 Finally, since participants were recruited via an internet research company, selection bias might have  
5 occurred, due to the non-representative nature of the internet population and the self-selection of participants  
6 (volunteer effect). The effect of bias due to the non-representative nature of the internet population will  
7 probably be minimal, since no difference in internet use is expected among smokers. The potential for self-  
8 selection bias can be estimated by measuring the response rate; the fairly high response rate (83%)  
9 decreases the chance for selection bias. Furthermore, several studies have shown that the validity and  
10 reliability of data obtained online are comparable to those obtained by classical methods [19-23].  
11

12 Despite the limitations described above, provides this study valuable information, which can aid decisions  
13 on the most appropriate strategies for counseling patients and communicating their test results.  
14

15 Firstly, misconceptions regarding smoking cessation rates using current smoking cessation  
16 (pharmaco)therapies need attention. Since smokers overestimate their chances to be able to quit smoking  
17 using the current (pharmaco)therapies, they might underestimate the positive effects of a genetic test for  
18 smoking. However, we should be careful with presenting this information to smokers, since this might also  
19 demotivate smokers to start a quit attempt.  
20

21 Secondly, the knowledge level on the influence of genetic factors on smoking addiction and cessation,  
22 and possibly also basic mechanisms of heredity, seems highly inadequate and should be addressed. Of  
23 course patients are not expected to be experts in this field. However, patients will need to have a certain  
24 level of insight on this subject. Without this knowledge, smokers will not be able to understand the test and  
25 the results properly. Therefore, they will not be able to make an accurate decision whether or not to  
26 undergo a genetic test for smoking nor to undergo the right treatment based on the results.  
27

28 Thirdly, ~~smokers seem to considerably underestimate their chances of having a genetic~~  
29 ~~predisposition, which could lead to an underestimation of the importance of undergoing a genetic test for~~  
30 ~~smoking as well. In a theoretical modelling study, based on the results of this survey, we have shown that~~  
31 ~~smokers who perceive a higher susceptibility or severity have a higher intention to undergo genetic testing~~  
32 ~~[24]. Therefore, increasing awareness of the probability and consequences of having a genetic~~  
33 ~~predisposition might be an effective strategy to motivate smokers to undergo a genetic test for smoking~~  
34 ~~cessation.~~  
35

**Deleted:** increasing awareness of the probability and consequences of having a genetic predisposition might be an effective strategy to motivate smokers to undergo a genetic test for smoking cessation. S

**Deleted:** . This

1 Fourthly, to motivate smokers to undergo a genetic test they could be made more aware of the  
2 advantages of genetic testing. However, disadvantages should not be under-represented either, because  
3 smokers may than inaccurately perceive the benefits and risks associated with genetic testing. Since fear  
4 has been shown to decrease intention to undergo genetic testing in our theoretical modelling study [24],  
5 this might result in an increased uptake of a genetic test for smoking cessation by decreasing the fear for  
6 genetic testing.

7  
8  
9  
10  
11 Furthermore, uptake might be further increased when smoker's ability to undergo a genetic test and  
12 deal with the results (e.g. self-efficacy) is improved. Currently, only 30-40% of the participants believed to  
13 be able to cope with a genetic test for smoking cessation. In our theoretical modelling study intention to  
14 undergo genetic testing was found to increase when smokers feel they would be able to cope with the  
15 results [24].

16  
17  
18  
19 Finally, it seems that smokers allocate their GPs a crucial role in the provision of information on this  
20 subject and the delivery of a genetic test for smoking. However, several studies indicate that they may not  
21 have the knowledge, willingness or training to take on this role [25-28]. Many GPs were not sure if they  
22 would be able to understand the meaning of genetic test results, how such information should direct  
23 clinical care, and their ability to effectively communicate genetic information to patients [28]. Furthermore,  
24 physicians are concerned that integrating genetic testing into their practice would also add to their already  
25 restricted time constraints [28].

26  
27  
28  
29  
30  
31 Since this survey was conducted among Dutch smokers only, the results might not be completely  
32 generalisable to other smoking populations.

33  
34 Firstly, since genetic testing is explicitly regulated in the Netherlands [17], it is to be expected that  
35 smokers perceive less disadvantages of genetic testing than smokers in other countries where regulation is  
36 less explicit. Therefore, smokers are likely to perceive more disadvantages of genetic testing in countries  
37 with less regulation, as has been found in the USA [15,16]. This might decrease their intention to undergo  
38 genetic testing for smoking cessation.

39  
40  
41  
42 Secondly, the level of education is likely to influence the knowledge level. However, since the  
43 education level in the Netherlands is relatively high, and even here the knowledge level is low, it is not to  
44 be expected that the knowledge level is adequate in other countries. Furthermore, comparable results  
45 have been found before [12].

46  
47  
48  
49 Thirdly, in the Netherlands, the GP plays a central role in the provision of health care and that is  
50 probably why Dutch smokers allocate their GPs an important role in the provision of information and the  
51



1 genetic test itself. This could be different for countries with another healthcare system. However, it is to be  
2 expected that intention will be increased when it is offered by the primary health care provider in other  
3 countries as well, regardless of the type of primary health care provider.  
4

5  
6 However, the general conclusions will probably also apply to other countries. And the results from this  
7 study also provide a good starting point for the investigation of this issue among other populations.  
8  
9

Deleted: Furthermore

10  
11 In general, we may conclude that Dutch smokers are mildly interested in genetic testing for smoking  
12 cessation, especially when offered by their GP. However, smokers still have much to learn about this  
13 subject and GPs attitudes and knowledge should be addressed to make a successful implementation in  
14 daily practice possible.  
15  
16  
17  
18  
19  
20  
21  
22  
23  
24  
25  
26  
27  
28  
29  
30  
31  
32  
33  
34  
35  
36  
37  
38  
39  
40  
41  
42  
43  
44  
45  
46  
47  
48  
49  
50  
51  
52  
53  
54  
55  
56  
57  
58  
59  
60

For peer review only

**Competing interests**

Van Schayck reported having received financing (grant, consultancy, and/or travel/accommodation costs) from AstraZeneca, Boehringer Ingelheim and Pfizer, unrelated to this study. Quaak, Smerecnik, De Vries and Van Schooten declare no conflicts of interest.

**Funding**

This work was supported by a grant from the Netherlands Organization for Health Research and Development (ZonMW, The Hague; Project No. 50-50101-96-404).

**Author contributions**

Quaak and Smerecnik designed the survey, and wrote the analysis-plan. Quaak analysed the data and drafted the manuscript. Smerecnik revised the draft paper. Van Schooten, de Vries and van Schayck, supervised the designing of the survey and revised the draft paper.

For peer review only

## REFERENCES

1. Guindon GE, Boisclair D. Past, current and future trends in tobacco use. HNP discussion paper no.6. Economics of tobacco control paper no. 6. 2003.
2. World Health Organization. The world health report 2003 - shaping the future; 2003.
3. Mucha L, Stephenson J, Morandi N, et al. Meta-analysis of disease risk associated with smoking, by gender and intensity of smoking. *Genet Med*. 2006;**3**:279-291.
4. Taylor DH, Jr., Hasselblad V, Henley SJ, et al. Benefits of smoking cessation for longevity. *Am J Public Health*. 2002;**92**:990-996.
5. Quaak M, van Schayck CP, Knaapen AM, et al. Genetic variation as a predictor of smoking cessation success. A promising preventive and intervention tool for chronic respiratory diseases? *Eur Respir J*. 2009;**33**:468-480.
6. Li MD, Cheng R, Ma JZ, et al. A meta-analysis of estimated genetic and environmental effects on smoking behavior in male and female adult twins. *Addiction*. 2003;**98**:23-31.
7. Munafo MR, Johnstone EC. Genes and cigarette smoking. *Addiction*. 2008;**103**:893-904.
8. Kaprio J. Genetic epidemiology of smoking behavior and nicotine dependence. *Copd*. 2009;**6**:304-306.
9. Kortmann GL, Dobler CJ, Bizarro L, et al. Pharmacogenetics of smoking cessation therapy. *Am J Med Genet B Neuropsychiatr Genet*. 2010;**153B**:17-28.
10. Quaak M, van Schayck CP, Knaapen AM, et al. Implications of gene-drug interactions in smoking cessation for improving the prevention of chronic degenerative diseases. *Mutat Res*. 2009;**667**:44-57.
11. Heatherton TF, Kozlowski LT, Frecker RC, et al. The Fagerstrom Test for Nicotine Dependence: a revision of the Fagerstrom Tolerance Questionnaire. *Br J Addict*. 1991;**86**:1119-1127.
12. Houfek JF, Atwood JR, Wolfe RM, et al. Knowledge and beliefs about genetics and smoking among visitors and staff at a health care facility. *Public Health Nurs*. 2008;**25**:77-87.
13. Lerman C, Caporaso NE, Audrain J, et al. Evidence suggesting the role of specific genetic factors in cigarette smoking. *Health Psychol*. 1999;**18**:14-20.
14. Batra V, Patkar AA, Berrettini WH, et al. The genetic determinants of smoking. *Chest*. 2003;**123**:1730-1739.
15. Lapham EV, Kozma C, Weiss JO. Genetic discrimination: perspectives of consumers. *Science*. 1996;**274**:621-624.
16. Hall MA, McEwen JE, Barton JC, et al. Concerns in a primary care population about genetic discrimination by insurers. *Genet Med*. 2005;**7**:311-316.
17. Murthy A, Dixon A, Mossialos E. Genetic testing and insurance. *J R Soc Med*. 2001;**94**:57-60.
18. Sanderson SC, O'Neill SC, Bastian LA, et al. What can interest tell us about uptake of genetic testing? Intention and behavior amongst smokers related to patients with lung cancer. *Public Health Genomics*. 2010;**13**:116-124.
19. Krantz JH, Ballard J, Scher J. Comparing the results of laboratory and World-Wide Web samples on the determinants of female attractiveness. *Behavior Research Methods, Instruments, & Computers*. 1997;**29**:264-269.
20. Buchanan T, Smith JL. Using the Internet for psychological research: personality testing on the World Wide Web. *Br J Psychol*. 1999;**90**:125-144.
21. Buchanan T, Smith JL. Research on the Internet: validation of a World-Wide Web mediated personality scale. *Behav Res Methods Instrum Comput*. 1999;**31**:565-571.
22. Nathanson AT, Reinert SE. Windsurfing injuries: results of a paper- and Internet-based survey. *Wilderness Environ Med*. 1999;**10**:218-225.
23. Senior C, Phillips ML, Barnes J, et al. An investigation into the perception of dominance from schematic faces: a study using the World-Wide Web. *Behav Res Methods Instrum Comput*. 1999;**31**:341-346.
24. [Smerecnik C, Quaak M, van Schayck CP, van Schooten FJ, de Vries H. Are smokers interested in genetic testing for smoking addiction? A socio-cognitive approach. \*Psychol Health\*. \[Epub ahead of publication\]](#)
25. Suther S, Goodson P. Barriers to the provision of genetic services by primary care physicians: a systematic review of the literature. *Genet Med*. 2003;**5**:70-76.

- 1 | [26.](#) Baars MJ, Henneman L, Ten Kate LP. Deficiency of knowledge of genetics and genetic tests among general  
2 | practitioners, gynecologists, and pediatricians: a global problem. *Genet Med.* 2005;**7**:605-610.
- 3 | [27.](#) Shields AE, Blumenthal D, Weiss KB, et al. Barriers to translating emerging genetic research on smoking into  
4 | clinical practice. Perspectives of primary care physicians. *J Gen Intern Med.* 2005;**20**:131-138.
- 5 | [28.](#) Park ER, Kleimann S, Pelan JA, et al. Anticipating clinical integration of genetically tailored tobacco dependence  
6 | treatment: perspectives of primary care physicians. *Nicotine Tob Res.* 2007;**9**:271-279.
- 7 |  
8 |  
9 |  
10 |  
11 |  
12 |  
13 |  
14 |  
15 |  
16 |  
17 |  
18 |  
19 |  
20 |  
21 |  
22 |  
23 |  
24 |  
25 |  
26 |  
27 |  
28 |  
29 |  
30 |  
31 |  
32 |  
33 |  
34 |  
35 |  
36 |  
37 |  
38 |  
39 |  
40 |  
41 |  
42 |  
43 |  
44 |  
45 |  
46 |  
47 |  
48 |  
49 |  
50 |  
51 |  
52 |  
53 |  
54 |  
55 |  
56 |  
57 |  
58 |  
59 |  
60 |

For peer review only

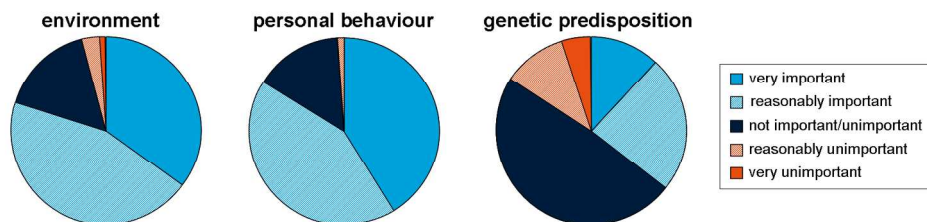

Figure S1: Perceived importance of environment, personal behavior and genetic predisposition as a cause for smoking  
324x78mm (150 x 150 DPI)

peer review only

1  
2  
3  
4  
5  
6  
7  
8  
9  
10  
11  
12  
13  
14  
15  
16  
17  
18  
19  
20  
21  
22  
23  
24  
25  
26  
27  
28  
29  
30  
31  
32  
33  
34  
35  
36  
37  
38  
39  
40  
41  
42  
43  
44  
45  
46  
47  
48  
49  
50  
51  
52  
53  
54  
55  
56  
57  
58  
59  
60

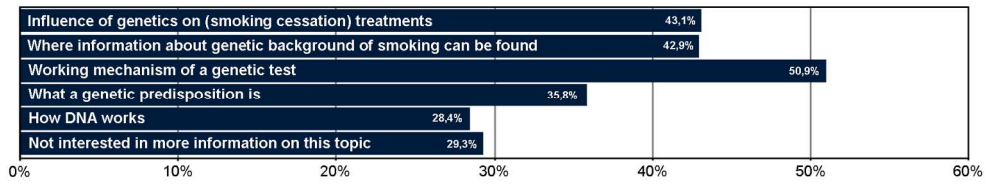

Figure S2-A: Topics of interest  
325x66mm (150 x 150 DPI)

For peer review only

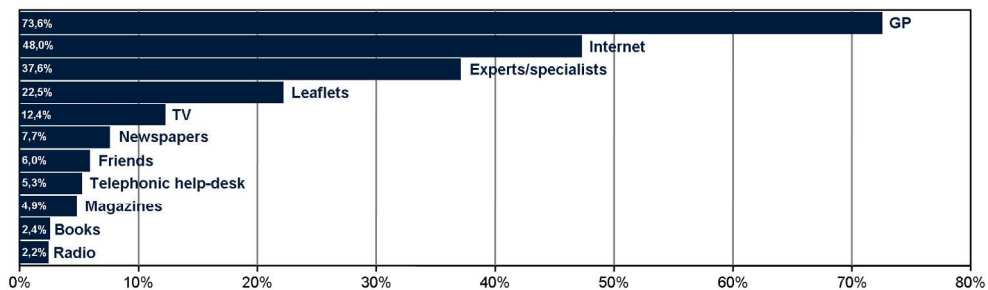

Figure S2-B: Channels of interest for obtaining more information  
323x98mm (150 x 150 DPI)

peer review only

1  
2  
3  
4  
5  
6  
7  
8  
9  
10  
11  
12  
13  
14  
15  
16  
17  
18  
19  
20  
21  
22  
23  
24  
25  
26  
27  
28  
29  
30  
31  
32  
33  
34  
35  
36  
37  
38  
39  
40  
41  
42  
43  
44  
45  
46  
47  
48  
49  
50  
51  
52  
53  
54  
55  
56  
57  
58  
59  
60

1  
2  
3  
4  
5  
6  
7  
8  
9  
10  
11  
12  
13  
14  
15  
16  
17  
18  
19  
20  
21  
22  
23  
24  
25  
26  
27  
28  
29  
30  
31  
32  
33  
34  
35  
36  
37  
38  
39  
40  
41  
42  
43  
44  
45  
46  
47  
48  
49  
50  
51  
52  
53  
54  
55  
56  
57  
58  
59  
60

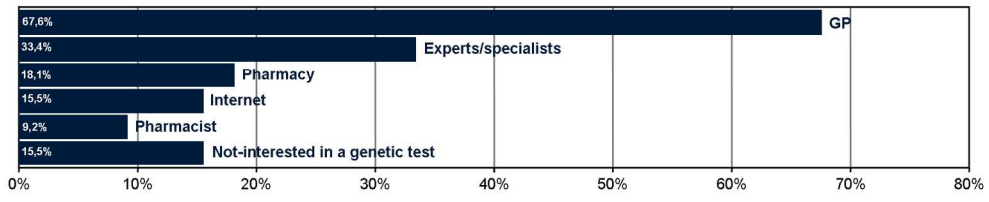

Figure S2-C: Channels of interest for obtaining genetic test  
323x69mm (150 x 150 DPI)

Or peer review only



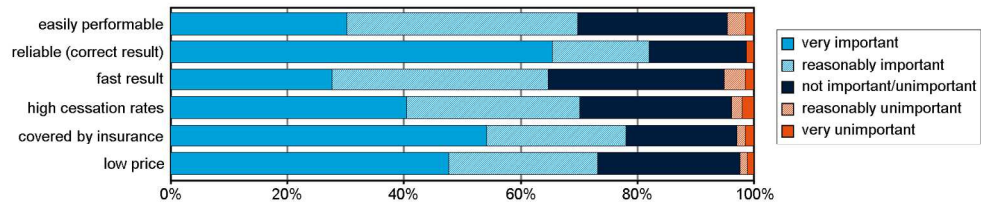

Figure S3: Test characteristics  
322x71mm (150 x 150 DPI)

Or peer review only

1  
2  
3  
4  
5  
6  
7  
8  
9  
10  
11  
12  
13  
14  
15  
16  
17  
18  
19  
20  
21  
22  
23  
24  
25  
26  
27  
28  
29  
30  
31  
32  
33  
34  
35  
36  
37  
38  
39  
40  
41  
42  
43  
44  
45  
46  
47  
48  
49  
50  
51  
52  
53  
54  
55  
56  
57  
58  
59  
60

STROBE 2007 (v4) checklist of items to be included in reports of observational studies in epidemiology\*  
Checklist for cohort, case-control, and cross-sectional studies (combined)

| Section/Topic             | Item # | Recommendation                                                                                                                                                                                                                                                                                                                                                                                                                                                         | Reported on page # |
|---------------------------|--------|------------------------------------------------------------------------------------------------------------------------------------------------------------------------------------------------------------------------------------------------------------------------------------------------------------------------------------------------------------------------------------------------------------------------------------------------------------------------|--------------------|
| Title and abstract        | 1      | (a) Indicate the study’s design with a commonly used term in the title or the abstract                                                                                                                                                                                                                                                                                                                                                                                 | 1,2                |
|                           |        | (b) Provide in the abstract an informative and balanced summary of what was done and what was found                                                                                                                                                                                                                                                                                                                                                                    | 2,3                |
| <b>Introduction</b>       |        |                                                                                                                                                                                                                                                                                                                                                                                                                                                                        |                    |
| Background/rationale      | 2      | Explain the scientific background and rationale for the investigation being reported                                                                                                                                                                                                                                                                                                                                                                                   | 4                  |
| Objectives                | 3      | State specific objectives, including any pre-specified hypotheses                                                                                                                                                                                                                                                                                                                                                                                                      | 4                  |
| <b>Methods</b>            |        |                                                                                                                                                                                                                                                                                                                                                                                                                                                                        |                    |
| Study design              | 4      | Present key elements of study design early in the paper                                                                                                                                                                                                                                                                                                                                                                                                                | 5                  |
| Setting                   | 5      | Describe the setting, locations, and relevant dates, including periods of recruitment, exposure, follow-up, and data collection                                                                                                                                                                                                                                                                                                                                        | not applicable     |
| Participants              | 6      | (a) <i>Cohort study</i> —Give the eligibility criteria, and the sources and methods of selection of participants. Describe methods of follow-up<br><i>Case-control study</i> —Give the eligibility criteria, and the sources and methods of case ascertainment and control selection. Give the rationale for the choice of cases and controls<br><i>Cross-sectional study</i> —Give the eligibility criteria, and the sources and methods of selection of participants | 5                  |
|                           |        | (b) <i>Cohort study</i> —For matched studies, give matching criteria and number of exposed and unexposed<br><i>Case-control study</i> —For matched studies, give matching criteria and the number of controls per case                                                                                                                                                                                                                                                 | not applicable     |
| Variables                 | 7      | Clearly define all outcomes, exposures, predictors, potential confounders, and effect modifiers. Give diagnostic criteria, if applicable                                                                                                                                                                                                                                                                                                                               | 5-6                |
| Data sources/ measurement | 8*     | For each variable of interest, give sources of data and details of methods of assessment (measurement). Describe comparability of assessment methods if there is more than one group                                                                                                                                                                                                                                                                                   | 5-6                |
| Bias                      | 9      | Describe any efforts to address potential sources of bias                                                                                                                                                                                                                                                                                                                                                                                                              | 14                 |
| Study size                | 10     | Explain how the study size was arrived at                                                                                                                                                                                                                                                                                                                                                                                                                              | 5                  |
| Quantitative variables    | 11     | Explain how quantitative variables were handled in the analyses. If applicable, describe which groupings were chosen and why                                                                                                                                                                                                                                                                                                                                           | not applicable     |
| Statistical methods       | 12     | (a) Describe all statistical methods, including those used to control for confounding                                                                                                                                                                                                                                                                                                                                                                                  | not applicable     |
|                           |        | (b) Describe any methods used to examine subgroups and interactions                                                                                                                                                                                                                                                                                                                                                                                                    | not applicable     |
|                           |        | (c) Explain how missing data were addressed                                                                                                                                                                                                                                                                                                                                                                                                                            | not applicable     |
|                           |        | (d) <i>Cohort study</i> —If applicable, explain how loss to follow-up was addressed<br><i>Case-control study</i> —If applicable, explain how matching of cases and controls was addressed                                                                                                                                                                                                                                                                              | not applicable     |

|                          |     |                                                                                                                                                                                                              |                |
|--------------------------|-----|--------------------------------------------------------------------------------------------------------------------------------------------------------------------------------------------------------------|----------------|
|                          |     | <i>Cross-sectional study</i> —If applicable, describe analytical methods taking account of sampling strategy                                                                                                 |                |
|                          |     | (e) Describe any sensitivity analyses                                                                                                                                                                        | not applicable |
| <b>Results</b>           |     |                                                                                                                                                                                                              |                |
| Participants             | 13* | (a) Report numbers of individuals at each stage of study—eg numbers potentially eligible, examined for eligibility, confirmed eligible, included in the study, completing follow-up, and analysed            | 5              |
|                          |     | (b) Give reasons for non-participation at each stage                                                                                                                                                         | 5              |
|                          |     | (c) Consider use of a flow diagram                                                                                                                                                                           | x              |
| Descriptive data         | 14* | (a) Give characteristics of study participants (eg demographic, clinical, social) and information on exposures and potential confounders                                                                     | 7              |
|                          |     | (b) Indicate number of participants with missing data for each variable of interest                                                                                                                          | not applicable |
|                          |     | (c) <i>Cohort study</i> —Summarise follow-up time (eg, average and total amount)                                                                                                                             | x              |
| Outcome data             | 15* | <i>Cohort study</i> —Report numbers of outcome events or summary measures over time                                                                                                                          | x              |
|                          |     | <i>Case-control study</i> —Report numbers in each exposure category, or summary measures of exposure                                                                                                         | x              |
|                          |     | <i>Cross-sectional study</i> —Report numbers of outcome events or summary measures                                                                                                                           | 7-11           |
| Main results             | 16  | (a) Give unadjusted estimates and, if applicable, confounder-adjusted estimates and their precision (eg, 95% confidence interval). Make clear which confounders were adjusted for and why they were included | not applicable |
|                          |     | (b) Report category boundaries when continuous variables were categorized                                                                                                                                    | 7-11           |
|                          |     | (c) If relevant, consider translating estimates of relative risk into absolute risk for a meaningful time period                                                                                             | not applicable |
| Other analyses           | 17  | Report other analyses done—eg analyses of subgroups and interactions, and sensitivity analyses                                                                                                               | not applicable |
| <b>Discussion</b>        |     |                                                                                                                                                                                                              |                |
| Key results              | 18  | Summarise key results with reference to study objectives                                                                                                                                                     | 12-15          |
| Limitations              | 19  | Discuss limitations of the study, taking into account sources of potential bias or imprecision. Discuss both direction and magnitude of any potential bias                                                   | 13-14          |
| Interpretation           | 20  | Give a cautious overall interpretation of results considering objectives, limitations, multiplicity of analyses, results from similar studies, and other relevant evidence                                   | 12-15          |
| Generalisability         | 21  | Discuss the generalisability (external validity) of the study results                                                                                                                                        | 15             |
| <b>Other information</b> |     |                                                                                                                                                                                                              |                |
| Funding                  | 22  | Give the source of funding and the role of the funders for the present study and, if applicable, for the original study on which the present article is based                                                | 15             |

\*Give information separately for cases and controls in case-control studies and, if applicable, for exposed and unexposed groups in cohort and cross-sectional studies.

**Note:** An Explanation and Elaboration article discusses each checklist item and gives methodological background and published examples of transparent reporting. The STROBE checklist is best used in conjunction with this article (freely available on the Web sites of PLoS Medicine at <http://www.plosmedicine.org/>, Annals of Internal Medicine at <http://www.annals.org/>, and Epidemiology at <http://www.epidem.com/>). Information on the STROBE Initiative is available at [www.strobe-statement.org](http://www.strobe-statement.org).

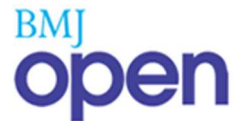

**Knowledge, attitudes, and preferences regarding genetic testing for smoking cessation.  
A cross-sectional survey among Dutch smokers.**

|                                 |                                                                                                                                                                                                                                                                                                                                                                                                                                                                                                                                                                                                                                                                                         |
|---------------------------------|-----------------------------------------------------------------------------------------------------------------------------------------------------------------------------------------------------------------------------------------------------------------------------------------------------------------------------------------------------------------------------------------------------------------------------------------------------------------------------------------------------------------------------------------------------------------------------------------------------------------------------------------------------------------------------------------|
| Journal:                        | <i>BMJ Open</i>                                                                                                                                                                                                                                                                                                                                                                                                                                                                                                                                                                                                                                                                         |
| Manuscript ID:                  | bmjopen-2011-000321.R1                                                                                                                                                                                                                                                                                                                                                                                                                                                                                                                                                                                                                                                                  |
| Article Type:                   | Research                                                                                                                                                                                                                                                                                                                                                                                                                                                                                                                                                                                                                                                                                |
| Date Submitted by the Author:   | 29-Oct-2011                                                                                                                                                                                                                                                                                                                                                                                                                                                                                                                                                                                                                                                                             |
| Complete List of Authors:       | Quaak, Marieke; Nutrition and Toxicology Research Institute Maastricht (NUTRIM), Maastricht University, Toxicology; Care and Public Health Research Institute (CAPHRI), Maastricht University, General Practice Smerecnik, Chris; Care and Public Health Research Institute (CAPHRI), Maastricht University, Health Promotion van Schooten, Frederik; Nutrition and Toxicology Research Institute Maastricht (NUTRIM), Maastricht University, Toxicology de Vries, Hein; Care and Public Health Research Institute (CAPHRI), Maastricht University, Health Promotion van Schayck, Constant; Care and Public Health Research Institute (CAPHRI), Maastricht University, General Practice |
| <b>Primary Subject Heading</b>: | Smoking & tobacco                                                                                                                                                                                                                                                                                                                                                                                                                                                                                                                                                                                                                                                                       |
| Secondary Subject Heading:      | Genetics and genomics, Qualitative research                                                                                                                                                                                                                                                                                                                                                                                                                                                                                                                                                                                                                                             |
| Keywords:                       | nicotine, cessation, GENETICS, public opinion                                                                                                                                                                                                                                                                                                                                                                                                                                                                                                                                                                                                                                           |
|                                 |                                                                                                                                                                                                                                                                                                                                                                                                                                                                                                                                                                                                                                                                                         |

SCHOLARONE™  
Manuscripts

# Knowledge, attitudes, and preferences regarding genetic testing for smoking cessation.

## A cross-sectional survey among Dutch smokers.

Marieke Quaak<sup>1,2</sup>

Chris Smerecnik<sup>3</sup>

Frederik J. van Schooten<sup>1</sup>

Hein de Vries<sup>3</sup>

Constant P. van Schayck<sup>2</sup>

<sup>1</sup> *Department of Toxicology, Nutrition and Toxicology Research Institute Maastricht (NUTRIM), Maastricht University, Maastricht, the Netherlands;*

<sup>2</sup> *Department of General Practice, Care and Public Health Research Institute (CAPHRI), Maastricht University, Maastricht, the Netherlands;*

<sup>3</sup> *Department of Health Promotion, Care and Public Health Research Institute (CAPHRI), Maastricht University, Maastricht, the Netherlands*

**Keywords:** nicotine dependence – smoking cessation – (pharmaco)genetic testing – knowledge – attitudes – preferences

### Address correspondence to:

M. Quaak

Department of Toxicology

Nutrition and Toxicology Research Institute Maastricht (NUTRIM)

Maastricht University

P.O. Box 616, 6200 MD Maastricht, The Netherlands

E-mail: [m.quaak@maastrichtuniversity.nl](mailto:m.quaak@maastrichtuniversity.nl), Phone: +31 43 3881088, Fax: +31 43 3884146

**ABSTRACT**

**Objectives:** Recent research strongly suggests that genetic variation influences smokers' ability to stop. Therefore, the use of (pharmaco)genetic testing may increase cessation rates. This study aims to assess the intention of smokers concerning undergoing genetic testing for smoking cessation, and their knowledge, attitudes and preferences about this subject.

**Design:** Online cross-sectional survey.

**Setting:** Database internet research company of which every inhabitant of the Netherlands of  $\geq 12$  years with an e-mail address and capable of understanding Dutch can become a member.

**Participants:** 587 of 711 Dutch smokers aged  $\geq 18$  years, daily smokers for  $\geq 5$  years and smoke on average  $\geq 10$  cigarettes/day (response rate = 83%).

**Primary and secondary outcome measures:** Smokers' knowledge, attitudes, and preferences and their intention to undergo genetic testing for smoking cessation.

**Results:** Knowledge on the influence of genetic factors in smoking addiction and cessation were found to be low. Smokers underestimated their chances of having a genetic predisposition and the influence of this on smoking cessation. Participants perceived few disadvantages, some advantages, and showed moderate self-efficacy towards undergoing a genetic test and dealing with the results. Smokers were mildly interested in receiving information and participating in genetic testing, especially when offered by their GP.

**Conclusions:** For successful implementation of genetic testing for smoking in general practice, several issues should be addressed, such as the knowledge on smoking cessation, genetics and genetic testing (including advantages and disadvantages), and the influence of genetics on smoking addiction and cessation. Furthermore, smokers allocate their GPs a crucial role in the provision of information and the delivery of a genetic test for smoking; however it is unclear whether GPs will be able and willing to take on this role.

**ARTICLE SUMMARY:****Article focus:**

- Intention of smokers to undergo genetic testing for smoking cessation.
- Smokers' knowledge, attitudes and preferences regarding genetic testing for smoking.
- To aid decisions on the most appropriate strategies for counseling patients and communicating their test results with regard to a genetic test for smoking.

**Key messages:**

- Smokers are mildly interested in receiving more information and participating in genetic testing for smoking cessation, especially when offered by their GP.
- Knowledge on smoking cessation, genetics and genetic testing (including advantages and disadvantages), and the influence of genetics on smoking cessation is low.

**Strengths and limitations:**

- This study provides valuable information on the needs and attitudes of smokers regarding genetic testing for smoking cessation, which can aid decisions for future implementation.
- Limitations:
  - Underrepresentation smokers intending to stop smoking might have led to an underestimation of smokers interested in genetic testing.
  - Low knowledge level on genetic testing for smoking cessation and genetics in general might have influenced participants' ability to answer the questions.
  - Interest in undergoing genetic testing may reflect a generally positive attitude towards genetic testing rather than actual uptake.
  - Selection bias might have occurred, due to the non-representative nature of the internet population and the self-selection of participants (volunteer effect); however unlikely due to high response rate (83%).

## INTRODUCTION

With currently still over 1.2 billion smokers world-wide, tobacco smoking continues to be the largest preventable cause of disease and premature death [1-3]. Cessation reverses most adverse effects of smoking [4]. Although most smokers are highly motivated to quit, and many (pharmacological) treatments are available to help them, cessation rates remain low; the average 12-month success rate ranges from 15 to 30% [5], but substantial variability exists in success rates across smokers. Therefore, multiple quit attempts are often required.

Recent research strongly suggests that smokers vary in their underlying genetic susceptibility to become addicted to smoking and their ability to stop smoking [5-9]. Genetic variation may also influence a smoker's response to a particular smoking cessation pharmacotherapy. Hence, overall effectiveness of smoking cessation pharmacotherapy may potentially be increased if it will be targeted at smokers most likely to respond to a particular type of pharmacotherapy. Reviews concerning preliminary findings of studies investigating the effect of genetic polymorphisms on smoking cessation suggest promising effects [5, 10, 11], making the use of (pharmaco)genetic testing for smoking in clinical practice for increasing quit rates by genetically-tailored smoking cessation treatment in the near future more likely.

Future implementation of (pharmaco)genetic testing for smoking in daily medical practice, however, will ultimately depend upon smokers' acceptance of these tests. At present there is relatively little knowledge about the willingness and preferences of smokers concerning genetic testing for smoking addiction and cessation, and about individuals' knowledge and attitudes on this subject.

The goal of this study, therefore, is to investigate the intention of smokers to undergo genetic testing for smoking cessation, and their knowledge, risk perceptions, attitudes, and self-efficacy beliefs. Additionally, we assessed their preferences concerning a genetic test for smoking cessation, such as topics and channels of interest, and test characteristics. This information can be used to guide the future development of a (pharmaco)genetic test for smoking cessation.



## METHODS

### Study design

Smokers' knowledge, attitudes, and preferences and their intention to undergo genetic testing were assessed using an online cross-sectional survey.

### Recruitment

Participants were selected from the database of an internet research company originating from Maastricht University (Flycatcher Internet Research B.V., Maastricht, The Netherlands). The company has a database of ~20.000 members from which representative samples can be drawn. Every inhabitant of the Netherlands of  $\geq 12$  years with an e-mail address and capable of understanding Dutch can become a member. Members are recruited via digital media, written invitations, face-to-face contacts, and intermediaries. Since 2009 the panel is certified with a quality mark (ISO-26326).

Participants were eligible for inclusion if they were aged  $\geq 18$  years, were daily smokers for  $\geq 5$  years and smoked on average  $\geq 10$  cigarettes/day. In total, 711 participants that met the inclusion criteria were approached for this study. Two e-mails could not be delivered. Of the remaining invitations, 614 people responded. However, 26 questionnaires were not completely filled out and one case was removed because the fill out time indicated that this participant could not have read the questions before answering. Thus, a total of 587 participants were included in the present study (response rate = 83%).

### Questionnaire

The questionnaire was conducted in Dutch (questions in manuscript translated by authors) and took about 30 minutes to complete. Respondents were compensated for their time according to the standard of the research company (e.g. respondents receive a number of points which can be exchanged for a gift-certificate when a certain amount is reached).

#### *Participant characteristics*

Participants' age, gender, and education level were available from the company. In addition, participants were asked questions regarding their smoking behavior (type of tobacco product, number of cigarettes and/or shags per day, level of nicotine dependence (assessed by the Fagerström Test for Nicotine Dependence [FTND] [12]), previous quit attempts (number, duration, period until last attempt), and intention and intended period to quit.

### *Knowledge*

Knowledge was assessed using ten statements (see *Table 2*); two regarding smoking cessation in general, four regarding the influence of genetics on nicotine dependence, and four regarding the influence of genetics on smoking cessation (treatment). Participants were asked whether they agreed or disagreed with the statements, or did not know the answer. In addition, participants were asked how important environment, personal behavior and genetic predisposition were according to them as a cause for smoking.

### *Risk perceptions*

Participants were requested to estimate their probability that they have a genetic predisposition as a result of which they will have more difficulty to stop smoking, or they will experience more withdrawal symptoms (*1: very small – 5: very high*), as well as to indicate the seriousness of this (*1: completely not serious – 5: very serious*).

### *Attitudes and self-efficacy beliefs*

Attitudes towards undergoing genetic testing were assessed by 10 questions on the perceived advantages and 10 questions on the disadvantages, and self-efficacy (e.g. ability to undergo a genetic test and to deal with the results) using 4 questions (*1: completely disagree – 5: completely agree*; see *Table 3*).

### *Topics and channels of interest*

Participants were asked about which of the given topics they would like to receive more information, via which channels they would prefer to receive more information regarding a genetic test to help them stop smoking, and via which channels they would prefer to actually obtain the test.

### *Test characteristics*

Participants were asked how important a number of test characteristics (easily performable, reliability, fast result, sharp increased cessation rates, low price, covered by insurance) were for them when they would consider to undergo a genetic test to help them stop smoking (*1: very unimportant – 5: very important*). Further, participants were asked which maximum price they would be willing to pay for the genetic test.

### *Intention to undergo genetic testing*

Participants were asked if they were planning to undergo a genetic test to determine which smoking cessation therapy they could use best, and if they were planning to undergo a genetic test if it was offered by their general practitioner (GP), or if they would ask their GP for a genetic test (*1: strongly disagree – 5: strongly agree*).

## RESULTS

### Participant characteristics

Participant characteristics and characteristics of the general Dutch smoking population can be found in *Table 1*. No significant differences were found in terms of gender, age-group, education level, amount of cigarette smokers, and number of cigarettes smoked. Slightly more participants had attempted to quit smoking and they had undertaken slightly more quit attempts. A larger part of the sample smoked shag (rolling tobacco), but fewer smoked pipe/cigar/cigarillo's. Furthermore, participants seemed less interested in quitting than the general smoking population.

**Table 1: Baseline characteristics of the research sample (compared to the general smoking population)**

|                                                    | sample (n=587) |        |        | Dutch smoking population <sup>a</sup> |
|----------------------------------------------------|----------------|--------|--------|---------------------------------------|
|                                                    | No. / mean     | % / SD | range  |                                       |
| <b>Demographics</b>                                |                |        |        |                                       |
| Gender (No., %)                                    |                |        |        |                                       |
| male                                               | 292            | 49.7   |        | 53.6%                                 |
| female                                             | 295            | 50.3   |        | 46.4%                                 |
| Age (No., %)                                       |                |        |        |                                       |
| 20-39 years                                        | 192            | 32.7   |        | 41.0%                                 |
| 40-64 years                                        | 336            | 57.2   |        | 50.7%                                 |
| >65 years                                          | 59             | 10.1   |        | 8.3%                                  |
| Level of education (No., %)                        |                |        |        |                                       |
| low                                                | 184            | 31.3   |        | 39.0%                                 |
| medium                                             | 267            | 45.5   |        | 36.6%                                 |
| high                                               | 136            | 23.2   |        | 24.4%                                 |
| <b>Smoking characteristics</b>                     |                |        |        |                                       |
| Type of tobacco product smoked (No., %)            |                |        |        |                                       |
| Cigarettes                                         | 430            | 73.3   |        | 67.0%                                 |
| Shag (rolling tobacco)                             | 360            | 61.3   |        | 48.0%                                 |
| Pipe/cigars/cigarillo's                            | 28             | 4.8    |        | 17.0%                                 |
| Other                                              | 5              | 0.8    |        | -                                     |
| No. of cigarettes/shags smoked per day (mean, SD)  | 19.0           | 7.5    | 10-50  | 14.4                                  |
| FTND score (mean, SD)                              | 4.6            | 2.1    | 0-10   | -                                     |
| FTND score >6 (No., %)                             | 215            | 36.6   |        | -                                     |
| <b>Cessation characteristics</b>                   |                |        |        |                                       |
| Previously attempted to quit (No., %)              | 437            | 74.4   |        | 65.0%                                 |
| No. of previous attempts to quit (mean, SD)        | 2.9            | 3.1    | 1-40   | 2.2                                   |
| Duration longest quit attempt, days (mean, SD)     | 269.7          | 623.1  | 0-4015 | -                                     |
| Period until last quit attempt, years (mean, SD)   | 3.9            | 5.1    | 0-30   | -                                     |
| Intention to quit smoking (No., %)                 | 305            | 52.0   |        | 78.0%                                 |
| Intended period until quit attempt, years (No., %) |                |        |        |                                       |
| Within 1 month                                     | 22             | 3.7    |        | 11.0%                                 |
| Within 3 months                                    | 53             | 9.0    |        | 13.0%                                 |
| Within 6 months                                    | 50             | 8.5    |        | 13.0%                                 |
| Within 1 year                                      | 109            | 18.6   |        | 14.0%                                 |
| More than 1 year from now                          | 71             | 12.1   |        | 40.0%                                 |

<sup>a</sup> TNS Nipo/STIVORO. Continu Onderzoek rookgewoonten (COR) [continuous research smoking habits]. 2009

### Knowledge

*Table 2* presents the percentage of correct, incorrect and "don't know" answers.

The first set of statements concerned respondents' knowledge about smoking cessation. Overall, 88.9% knew that it is important to quit. About half (49.1%) of the respondents knew that less than half of the smokers who want to quit succeed, while 29.8% could not answer this question.

Table 2: Knowledge of smoking cessation, and influence of genetic factors on smoking addiction and smoking cessation (treatment)

|                                                                                                                                                                                  | correct | incorrect | don't know |
|----------------------------------------------------------------------------------------------------------------------------------------------------------------------------------|---------|-----------|------------|
| <b>Smoking cessation</b>                                                                                                                                                         |         |           |            |
| It is important to quit smoking, even if you already smoke for a very long time. (T)                                                                                             | 88.9%   | 4.3%      | 6.8%       |
| More than half of the smokers who want to quit smoking succeed in quitting. (F)                                                                                                  | 49.1%   | 21.1%     | 29.8%      |
| <b>Influence of genetic factors on smoking addiction levels</b>                                                                                                                  |         |           |            |
| The chance to become addicted to smoking is influenced by the presence of certain hereditary traits (genes). (T)                                                                 | 29.5%   | 27.9%     | 42.6%      |
| Genes exist that increase the chance to become addicted to smoking. (T)                                                                                                          | 33.4%   | 15.5%     | 51.1%      |
| Genes exist that decrease the chance to become addicted to smoking. (T)                                                                                                          | 15.5%   | 24.9%     | 59.6%      |
| A parent with a genetic predisposition to get addicted to smoking will transfer this predisposition to its children, even when the parent doesn't smoke or has never smoked. (T) | 14.0%   | 33.2%     | 52.8%      |
| <b>Influence of genetic factors on smoking cessation (treatment)</b>                                                                                                             |         |           |            |
| A genetic predisposition to get addicted to smoking might also influence ones chance to quit smoking. (T)                                                                        | 25.4%   | 21.1%     | 53.5%      |
| Due to a genetic predisposition can a smoking cessation therapy (e.g. nicotine patches) be less effective for certain smokers. (T)                                               | 26.4%   | 17.6%     | 56.0%      |
| Due to a genetic predisposition can a smoking cessation therapy (e.g. nicotine patches) be more effective for certain smokers. (T)                                               | 15.2%   | 24.5%     | 60.3%      |
| A genetic predisposition can influence the chance on withdrawal symptoms during a cessation attempt. (T)                                                                         | 23.9%   | 18.7%     | 57.4%      |

T: this statement is true; F: this statement is false

The second set measured whether respondents were aware of how genetic factors influence smoking addiction levels. About half of the participants could not answer these questions (42.6-59.6%). The lowest percentage of correct scores were found for the statements regarding the transfer of a genetic predisposition to the offspring by a non-smoking parent, and the existence of genes that decrease the chance of becoming addicted to smoking (14.0% and 15.5%, respectively). About one-third knew that the chance to become addicted to smoking is influenced by genes (29.5%), and that genes exist that increase the chance of becoming addicted to smoking (33.4%).

The third set assessed knowledge of the influence of genetic factors on smoking cessation and smoking cessation treatment. More than half of the respondents could not answer these (53.5-60.3%). About a quarter knew that a genetic predisposition might also influence ones chances to quit (25.4%), can make cessation therapy less effective for certain smokers (26.4%), and influences the chance on withdrawal symptoms during cessation (23.9%). Only 15.2% knew that a genetic predisposition can also make a cessation therapy more effective for certain smokers.

Furthermore, most respondents believed that environment and personal behavior were (very) important causes for smoking (80% and 84%, respectively), while only 36% believed that genetic predisposition is a (very) important cause of smoking (Figure S1).

### Risk perceptions

About one-third of the participants believed their probability to be (very) small to have a genetic predisposition as a result of which they will have more difficulty to stop smoking (38.3%), or have more withdrawal symptoms (39.4%) (*Table S1*). On the other hand, about one-fifth (16.8%, and 15.3%, respectively) believed their probability to be (very) big.

About half of the participants believed this to be (very) serious (53.9% and 51.5%), about two-fifth (35.6 and 39.2%) to be neutral, and about one-tenth (9.4 and 10.6%) to be (completely) not serious (*Table S1*).

### Attitudes and self-efficacy beliefs

Attitudes regarding genetic testing (perceived advantages and disadvantages), and self-efficacy beliefs can be found in *Table 3*.

About one-third to half of the participants did not agree with the statements about the disadvantages of genetic testing, about one-third to two-fifth had a neutral reaction, while only less than one-third (completely) agreed with these statements. Especially the chance that the results would become known at work or to the employer and that they would not be able to tell others was perceived as low (4.8% and 8.0% (completely) agreed, respectively).

On the other hand, only about one-third or less (completely) disagreed with the statements on the advantages of genetic testing (12.8-34.2%), while about half (43.1-61.0%) had a neutral reaction and 12.8-33.2% (completely) agreed. Participants were least convinced that they would be relieved by the results and most convinced that a genetic test would give a reliable result about the presence of a genetic predisposition to become addicted to smoking, and that it could help to determine the correct dose of smoking cessation medication.

About a quarter of the participants were unsure if they would be able to ask their GP for a genetic test or undergo a genetic test (27.6% and 25.7%, respectively), while about two-fifth (39.7% and 38.0%) had a neutral reaction, and one-third (32.7% and 36.3%) (totally) agreed with these statements. Further, they agreed even somewhat more to the beliefs that they would be able to undergo the correct treatment based on the results of the test, and to understand the results of the genetic test. Only, about 10-15% (totally) disagreed with these statements, about half (48.9% and 49.2%, respectively) did not agree or disagree with them and about two-fifth (39.9% and 35.6%) (totally) agreed with them.

Table 3: Attitudes and self-efficacy beliefs

|                                                                                                                  | completely disagree | disagree | neutral | agree | completely agree |
|------------------------------------------------------------------------------------------------------------------|---------------------|----------|---------|-------|------------------|
| <b>Disadvantages</b>                                                                                             |                     |          |         |       |                  |
| If I would undergo a genetic test...                                                                             |                     |          |         |       |                  |
| ...the results will become known at my work / to my employer.                                                    | 39.9%               | 29.3%    | 26.1%   | 3.9%  | 0.9%             |
| ...the results will become known to my health insurance.                                                         | 23.7%               | 20.6%    | 33.2%   | 18.9% | 3.6%             |
| ...and it will show that I am addicted to smoking will it be more difficult to get a mortgage or life-insurance. | 19.4%               | 22.1%    | 32.7%   | 19.9% | 5.8%             |
| ...the results may be passed on to all kinds of agencies.                                                        | 21.8%               | 26.6%    | 34.6%   | 12.9% | 4.1%             |
| ...I will learn about other diseases I have a predisposition for.                                                | 11.8%               | 15.5%    | 43.3%   | 26.1% | 3.4%             |
| ...I will be worried for the results.                                                                            | 9.0%                | 24.7%    | 40.4%   | 23.2% | 2.7%             |
| ...I will be afraid of the results.                                                                              | 10.9%               | 27.4%    | 42.2%   | 16.5% | 2.9%             |
| ...I will regret it due to possible consequences.                                                                | 10.4%               | 27.9%    | 44.5%   | 14.8% | 2.4%             |
| ...I will worry about the possible results of the genetic test.                                                  | 9.7%                | 22.7%    | 40.0%   | 23.9% | 3.7%             |
| ...I will not be able to tell the results to others.                                                             | 15.0%               | 38.2%    | 38.8%   | 6.6%  | 1.4%             |
| <b>Advantages</b>                                                                                                |                     |          |         |       |                  |
| If I would undergo a genetic test...                                                                             |                     |          |         |       |                  |
| ...this will indicate the correct smoking cessation therapy for me.                                              | 4.6%                | 13.5%    | 55.5%   | 21.5% | 4.9%             |
| ...this will increase the chances that I succeed to stop smoking.                                                | 6.1%                | 13.8%    | 54.9%   | 20.6% | 4.6%             |
| ...this will help to determine the correct dose of smoking cessation medication.                                 | 5.1%                | 10.6%    | 51.4%   | 27.8% | 5.1%             |
| ...I will have less side-effects from smoking cessation treatments.                                              | 6.0%                | 16.5%    | 61.0%   | 13.5% | 3.1%             |
| ...this can prevent that I take/undergo an incorrect smoking cessation treatment.                                | 5.5%                | 11.1%    | 56.4%   | 22.0% | 5.1%             |
| ...I will feel better since I know I have done everything I can to understand my smoking addiction.              | 12.6%               | 21.6%    | 50.3%   | 14.1% | 1.4%             |
| ...I will feel relieved by the results.                                                                          | 7.8%                | 15.8%    | 43.1%   | 29.5% | 3.7%             |
| ...I will be proud of myself.                                                                                    | 9.0%                | 21.3%    | 52.5%   | 14.8% | 2.4%             |
| ...I will be happy that I know my genetic risk.                                                                  | 9.5%                | 19.9%    | 45.5%   | 21.3% | 3.7%             |
| ...I will feel reassured.                                                                                        | 12.6%               | 21.6%    | 50.3%   | 14.1% | 1.4%             |
| <b>Self-efficacy</b>                                                                                             |                     |          |         |       |                  |
| Do you believe you will be able to...                                                                            |                     |          |         |       |                  |
| ...undergo a genetic test?                                                                                       | 7.5%                | 18.2%    | 38.0%   | 20.3% | 16.0%            |
| ...ask you GP for a genetic test when you have a need for it?                                                    | 7.2%                | 20.4%    | 39.7%   | 20.1% | 12.6%            |
| ...understand the results of the genetic test?                                                                   | 3.2%                | 8.0%     | 48.9%   | 27.3% | 12.6%            |
| ...undergo the correct treatment based on the results of the genetic test?                                       | 4.6%                | 10.6%    | 49.2%   | 17.5% | 18.1%            |

### Topics and channels of interest

About one-third of the participants (29.3%) were not interested in more information (see *Figure S2-A*). However, 28.4% were interested in more information on how DNA works, 35.8% in what a genetic predisposition is, and 50.9% in the working mechanism of a genetic test. Further, 42.9% were interested in where more information can be found about the genetic background of smoking, and 43.1% in more information about the influence of genetic differences on (smoking cessation) treatments.

Most participants (73.6%) would prefer to receive more information from their GP (*Figure S2-B*). Other channels via which participants would prefer to receive more information are the internet (48.0%), specialists (37.6%), leaflets (22.5%), TV (12.4%), newspapers (7.7%), friends (6.0%), a telephonic help-desk (5.3%), magazines (4.9%), radio (2.4%), and books (2.2%).

Most participants (67.6%) would also prefer to obtain the genetic test via their GP (*Figure S2-C*). Other preferred channels for obtaining the test were expert/specialist (33.4%), the pharmacy (18.1%), internet (15.5%), and the pharmacist (9.2%), while 15.5% was not interested in obtaining a genetic test.

### Test characteristics

The most important test characteristic according to the participants of this study is reliability (*Figure S3*); 82% of the participants believed this to be (very) important. Other test characteristics were also indicated as (very) important by most participants; covered by insurance (78%), a low price (74%), a sharp increase in cessation rates (71%), and a fast result (65%).

Most participants (64.7%) indicated not to be willing to pay more than €50 for the genetic test. About a quarter of the participants (24.2%) are willing to pay €50–€150, 8.9% will pay €150–€200, and only 2.2% is willing to pay more than €200.

### Intention to undergo genetic testing

Only a low number of participants (16.6%) were (completely) interested in undergoing a genetic test to determine which smoking cessation therapy they could use best (see *Table S2*). From the remaining participants, slightly less than half were (completely) not interested in undergoing a genetic test (43.5%) and about the same proportion was undecided as to whether or not they would be willing to undergo a genetic test (40.0%).

The intention to undergo genetic testing increased considerably when it would be offered by their GP (38.3%). On the other hand, only 7.8% would ask their GP for the genetic test, while about half of the participants (50.6%) would not ask their GP for the test.

## DISCUSSION

Significant advances have been made in elucidating the role of genetic factors in nicotine dependence and response to smoking cessation treatment. Although much work still remains to be done, the use of genetic testing for increasing quit rates by genetically-tailored smoking cessation treatment in clinical practice is on the horizon. However, at present few studies have investigated the needs and attitudes of smokers on this subject. Therefore, in this study we investigated knowledge, attitudes, and preferences of smokers on genetics of smoking, and their willingness to undergo genetic testing for smoking addiction and treatment.

This study provides valuable information, which can aid decisions on the most appropriate strategies for counseling patients and communicating their test results.

The results showed that misconceptions regarding smoking cessation rates using current smoking cessation (pharmaco)therapies need attention. Even though most smokers knew it is important to quit smoking, only about half of them knew that less than half of the smokers who want to quit smoking will



1  
2 succeed. In practice cessation rates are even much lower; only 15-30% will succeed in long-term quitting  
3 using the available treatments [5] and these rates are even lower when no treatment is used. Since  
4 smokers overestimate their chances to be able to quit smoking using the current (pharmaco)therapies, they  
5 might underestimate the positive effects of a genetic test for smoking. However, we should be careful with  
6 presenting this information to smokers, since this might also demotivate smokers to start a quit attempt.  
7  
8

9  
10  
11 The knowledge level on the influence of genetic factors on smoking addiction and cessation, and  
12 possibly also basic mechanisms of heredity, is highly inadequate and should be addressed as well. These  
13 results are comparable with a previous study [13], which also found that smokers, ex-smokers and non-  
14 smokers had little knowledge about genetic contributions to smoking and smoking-related behaviours.  
15 Furthermore, the most popular topics for receiving more information were the working mechanism of a  
16 genetic test, where more information about the genetic background of smoking can be found, and the  
17 influence of genetic differences on (smoking cessation) treatments. This confirms the lack of knowledge  
18 about the influence of genetics on smoking and smoking cessation that was found in this study. Moreover,  
19 about one-third of the participants were also interested in more information on what a genetic predisposition  
20 is and how DNA works, indicating a further lack of knowledge on genetics in general.  
21  
22  
23  
24  
25  
26  
27  
28  
29

30 Besides, smokers seem to considerably underestimate their chances of having a genetic predisposition and  
31 the influence of this on smoking and smoking cessation, which could lead to an underestimation of the  
32 importance of undergoing a genetic test for smoking as well. Respondents were found to perceive the  
33 probability of having a genetic predisposition to be (very) small to average, even though many of the  
34 genetic variants that have been shown to influence smoking behavior are prevalent in the population [6,  
35 14]. Comparable results were found by another study [13], in which 53% perceived themselves as "*not at*  
36 *all likely*" or "*somewhat likely*" to have inherited a genetic predisposition to smoking, while 47% perceived  
37 themselves to be "*moderately*" to "*extremely likely*". Furthermore, we found that most participants did not  
38 believe that a genetic predisposition is a (very) important cause of smoking, while it has been shown that  
39 genetic factors account for a vast part of the variance in smoking initiation, maintenance and cessation  
40 success [5, 7-9]. In the previous mentioned study also only a small part of the participants believed that  
41 inheriting a gene that predisposes them to smoke is the most important factor that causes people to  
42 smoke, although smokers were significantly more likely to agree with this [13]. Recently, we have shown in  
43 a theoretical modelling study based on the results of this survey, that smokers who perceive a higher  
44 susceptibility or severity have a higher intention to undergo genetic testing [15]. Thus increasing awareness of  
45  
46  
47  
48  
49  
50  
51  
52  
53  
54  
55  
56  
57  
58  
59  
60



1  
2 the probability and consequences of having a genetic predisposition might also be an effective strategy to  
3  
4 motivate smokers to undergo a genetic test for smoking cessation.

5  
6 Moreover, participants were found to perceive little disadvantages of genetic testing for smoking  
7  
8 addiction and cessation, but some advantages. Only a small part of the participants in this study were  
9  
10 concerned that the results would become known at their work or to their employer, their health insurance  
11  
12 or other agencies, and that it would become more difficult to get a mortgage or life-insurance when a  
13  
14 genetic test would show that they were addicted to smoking. On the contrary, research in other areas has  
15  
16 shown that those in the USA are particularly concerned about the potential for genetic test results to  
17  
18 become available to their employer, health insurance or life insurance [16, 17]. These differences might be  
19  
20 explained by the difference in laws in place to protect against the misuse of genetic information by  
21  
22 employers and insurers. In some countries genetic testing is explicitly regulated with regard to all aspects  
23  
24 (e.g. Austria, Netherlands and Norway), in others the regulation has focused only on the insurance  
25  
26 industry (e.g. Denmark, and Sweden) or even only on group health insurers (e.g. USA) [18]. Therefore, to  
27  
28 motivate smokers to undergo a genetic test they could be made more aware of the advantages of genetic  
29  
30 testing as well. However, disadvantages should not be under-represented either, because smokers may than  
31  
32 inaccurately perceive the benefits and risks associated with genetic testing. Since fear has been shown to  
33  
34 decrease intention to undergo genetic testing in our theoretical modelling study [15], increasing awareness of  
35  
36 advantages and disadvantages could decrease fear for genetic testing and might thereby result in an increased  
37  
38 uptake of a genetic test for smoking cessation.

39  
40 Uptake might be further increased when smoker's ability to undergo a genetic test and deal with the results  
41  
42 (e.g. self-efficacy) is improved. Currently, only 30-40% of the participants believed to be able to cope with a  
43  
44 genetic test for smoking cessation. In our theoretical modelling study intention to undergo genetic testing was  
45  
46 found to increase when smokers feel they would be able to cope with the results [15].

47  
48 Finally, it seems that smokers allocate their GPs a crucial role in the provision of information on this  
49  
50 subject and the delivery of a genetic test for smoking. Thus, it seems likely that GPs will play an important  
51  
52 role in the counseling of patients about undergoing genetic testing. However, several studies indicate that  
53  
54 they may not have the knowledge, willingness or training to take on this role [19-22]. Many GPs were not  
55  
56 sure if they would be able to understand the meaning of genetic test results, how such information should  
57  
58 direct clinical care, and their ability to effectively communicate genetic information to patients [21].  
59  
60 Furthermore, physicians are concerned that integrating genetic testing into their practice would also add to  
61  
62 their already restricted time constraints [21].

1  
2 Thus, for successful implementation of genetic testing for smoking in general practice, several issues  
3 should be addressed, such as the knowledge on smoking cessation, genetics and genetic testing  
4 (including advantages and disadvantages), and the influence of genetics on smoking addiction and  
5 cessation. Of course patients are not expected to be experts in this field. However, patients will need to  
6 have a certain level of insight on this subject. Without this knowledge, smokers will not be able to  
7 understand the test and the results properly. Therefore, they will not be able to make an accurate decision  
8 whether or not to undergo a genetic test for smoking nor to undergo the right treatment based on the  
9 results. GPs are likely to play an important role in the information provision, since they will have to help their  
10 patients to make the decision to undergo a genetic test and provide them with the treatment based on this  
11 test. However, due to the time-constraints it will probably not possible for a GP to fully explain this test to  
12 their patients during a consult. And furthermore, patients might not be interested in such a test if they do not  
13 have some knowledge about the influence of genetic factors on smoking and smoking cessation. Therefore,  
14 these issues should also be addressed via other channels of communication; for instance information leaflets  
15 or information campaigns on TV, radio or in magazines or newspapers.  
16  
17  
18  
19  
20  
21  
22  
23  
24  
25  
26  
27  
28

29 This study is subject to several limitations.

30  
31 Firstly, the field of pharmacogenetic influences on smoking cessation is still in its infancy, and therefore  
32 no well-accepted tests to tailor smoking cessation treatment are commonly available. However, it is of  
33 crucial importance to investigate the expectations of the smokers that are willing to quit before a genetic  
34 test can be developed that will enter the market. This knowledge on smokers' expectations can drive the  
35 implementation, promotional strategy and the information given when the test will become available.  
36 Therefore, from a health promotion and marketing perspective it is appropriate to start asking these  
37 questions at this time.  
38  
39  
40  
41  
42  
43

44 Secondly, as smokers may not be familiar with genetic testing for smoking addiction and genetically-  
45 tailored cessation treatments, or even genetics in general, it is questionable whether they were able to  
46 give a well-considered answer to all our questions.  
47  
48

49 Thirdly, as Sanderson and colleagues argued [23], interest in undergoing genetic testing may reflect a  
50 generally positive attitude towards genetic testing rather than actual uptake. Thus, to determine actual  
51 uptake of genetic testing further studies are needed were respondents are offered the possibility to  
52 undergo genetic testing.  
53  
54  
55

56 Fourthly, our sample underrepresented smokers intending to stop smoking, which could have led to an  
57 underestimation of the willingness to undergo genetic testing.  
58  
59  
60

1  
2 Fifthly, since participants were recruited via an internet research company, selection bias might have  
3 occurred, due to the non-representative nature of the internet population and the self-selection of participants  
4 (volunteer effect). The effect of bias due to the non-representative nature of the internet population will  
5 probably be minimal, since no difference in internet use is expected among smokers. The potential for self-  
6 selection bias can be estimated by measuring the response rate; the fairly high response rate (83%)  
7 decreases the chance for selection bias. Furthermore, several studies have shown that the validity and  
8 reliability of data obtained online are comparable to those obtained by classical methods [24-28].  
9

10  
11 Finally, since this survey was conducted among Dutch smokers only, the results might not be completely  
12 generalisable to other smoking populations. Genetic testing is explicitly regulated in the Netherlands [18],  
13 therefore it is to be expected that smokers perceive less disadvantages of genetic testing than smokers in other  
14 countries where regulation is less explicit. Smokers are thus likely to perceive more disadvantages of genetic  
15 testing in countries with less regulation, as has been found in the USA [16, 17], which might decrease their  
16 intention to undergo genetic testing for smoking cessation. Furthermore, the level of education is likely to  
17 influence the knowledge level. However, since the education level in the Netherlands is relatively high, and  
18 even here the knowledge level is low, it is not to be expected that the knowledge level is adequate in other  
19 countries. Indeed, comparable results have been found before [13]. Moreover, in the Netherlands, the GP plays  
20 a central role in the provision of health care and that is probably why Dutch smokers allocate their GPs an  
21 important role in the provision of information and the genetic test itself. This could be different for countries with  
22 another healthcare system. However, it is to be expected that intention will be increased when it is offered by  
23 the primary health care provider in other countries as well, regardless of the type of primary health care  
24 provider. However, the general conclusions will probably also apply to other countries. And the results from this  
25 study also provide a good starting point for the investigation of this issue among other populations.  
26  
27

28  
29 In general, we may conclude that Dutch smokers are interested in genetic testing for smoking cessation,  
30 especially when offered by their GP. However, before successful implementation of genetic testing for  
31 smoking in general practice will be possible, several issues should be addressed, such as the knowledge  
32 on smoking cessation, genetics and genetic testing (including advantages and disadvantages), and the  
33 influence of genetics on smoking addiction and cessation. Furthermore, GPs attitudes and knowledge  
34 should be addressed as well.  
35  
36  
37  
38  
39  
40  
41  
42  
43  
44  
45  
46  
47  
48  
49  
50  
51  
52  
53  
54  
55  
56  
57  
58  
59  
60

**Competing interests**

Van Schayck reported having received financing (grant, consultancy, and/or travel/accommodation costs) from AstraZeneca, Boehringer Ingelheim and Pfizer, unrelated to this study. Quaak, Smerecnik, De Vries and Van Schooten declare no conflicts of interest.

**Funding**

This work was supported by a grant from the Netherlands Organization for Health Research and Development (ZonMW, The Hague; Project No. 50-50101-96-404).

**Author contributions**

Quaak and Smerecnik designed the survey, and wrote the analysis-plan. Quaak analysed the data and drafted the manuscript. Smerecnik revised the draft paper. Van Schooten, de Vries and van Schayck, supervised the designing of the survey and revised the draft paper.

## REFERENCES

1. Guindon GE, Boisclair D. Past, current and future trends in tobacco use. HNP discussion paper no.6. Economics of tobacco control paper no. 6. 2003.
2. World Health Organization. The world health report 2003 - shaping the future; 2003.
3. Mucha L, Stephenson J, Morandi N, Dirani R. Meta-analysis of disease risk associated with smoking, by gender and intensity of smoking. *Genet Med*. 2006; **3**: 279-291.
4. Taylor DH, Jr., Hasselblad V, Henley SJ, Thun MJ, Sloan FA. Benefits of smoking cessation for longevity. *Am J Public Health*. 2002; **92**: 990-996.
5. Quaak M, van Schayck CP, Knaapen AM, van Schooten FJ. Genetic variation as a predictor of smoking cessation success. A promising preventive and intervention tool for chronic respiratory diseases? *Eur Respir J*. 2009; **33**: 468-480.
6. Batra V, Patkar AA, Berrettini WH, Weinstein SP, Leone FT. The Genetic Determinants of Smoking. *Chest*. 2003; **123**: 1730-1739.
7. Li MD, Cheng R, Ma JZ, Swan GE. A meta-analysis of estimated genetic and environmental effects on smoking behavior in male and female adult twins. *Addiction*. 2003; **98**: 23-31.
8. Munafò MR, Johnstone EC. Genes and cigarette smoking. *Addiction*. 2008; **103**: 893-904.
9. Kaprio J. Genetic epidemiology of smoking behavior and nicotine dependence. *COPD*. 2009; **6**: 304-306.
10. Kortmann GL, Dobler CJ, Bizarro L, Bau CH. Pharmacogenetics of smoking cessation therapy. *Am J Med Genet B Neuropsychiatr Genet*. 2010; **153B**: 17-28.
11. Quaak M, van Schayck CP, Knaapen AM, van Schooten FJ. Implications of gene-drug interactions in smoking cessation for improving the prevention of chronic degenerative diseases. *Mutat Res*. 2009; **667**: 44-57.
12. Heatherton TF, Kozlowski LT, Frecker RC, Fagerstrom KO. The Fagerstrom Test for Nicotine Dependence: a revision of the Fagerstrom Tolerance Questionnaire. *Br J Addict*. 1991; **86**: 1119-1127.
13. Houfek JF, Atwood JR, Wolfe RM, Agrawal S, Reiser GM, Schaefer GB, Rennard SI. Knowledge and beliefs about genetics and smoking among visitors and staff at a health care facility. *Public Health Nurs*. 2008; **25**: 77-87.
14. Lerman C, Caporaso N, Main D, Audrain J, Boyd NR, Bowman ED, Shields PG. Evidence suggesting the role of specific genetic factors in cigarette smoking. *Health Psychology*. 1999; **18**: 14-20.
15. Smerecnik C, Quaak M, van Schayck CP, van Schooten FJ, de Vries H. Are smokers interested in genetic testing for smoking addiction? A socio-cognitive approach. *Psychol Health*. [Epub ahead of print]
16. Lapham EV, Kozma C, Weiss JO. Genetic discrimination: perspectives of consumers. *Science*. 1996; **274**: 621-624.
17. Hall MA, McEwen JE, Barton JC, Walker AP, Howe EG, Reiss JA, Power TE, Ellis SD, Tucker DC, Harrison BW, McLaren GD, Ruggiero A, Thomson EJ. Concerns in a primary care population about genetic discrimination by insurers. *Genet Med*. 2005; **7**: 311-316.
18. Murthy A, Dixon A, Mossialos E. Genetic testing and insurance. *J R Soc Med*. 2001; **94**: 57-60.
19. Baars MJ, Henneman L, Ten Kate LP. Deficiency of knowledge of genetics and genetic tests among general practitioners, gynecologists, and pediatricians: a global problem. *Genet Med*. 2005; **7**: 605-610.
20. Shields AE, Blumenthal D, Weiss KB, Comstock CB, Currihan D, Lerman C. Barriers to translating emerging genetic research on smoking into clinical practice. Perspectives of primary care physicians. *J Gen Intern Med*. 2005; **20**: 131-138.
21. Park ER, Kleimann S, Pelan JA, Shields AE. Anticipating clinical integration of genetically tailored tobacco dependence treatment: perspectives of primary care physicians. *Nicotine Tob Res*. 2007; **9**: 271-279.
22. Suther S, Goodson P. Barriers to the provision of genetic services by primary care physicians: a systematic review of the literature. *Genet Med*. 2003; **5**: 70-76.
23. Sanderson SC, O'Neill SC, Bastian LA, Bepler G, McBride CM. What can interest tell us about uptake of genetic testing? Intention and behavior amongst smokers related to patients with lung cancer. *Public Health Genomics*. 2010; **13**: 116-124.
24. Krantz JH, Ballard J, Scher J. Comparing the results of laboratory and World-Wide Web samples on the determinants of female attractiveness. *Behav Res Methods Instrum Comput*. 1997; **29**: 264-269.
25. Buchanan T, Smith JL. Using the Internet for psychological research: personality testing on the World Wide Web. *Br J Psychol*. 1999; **90**: 125-144.
26. Buchanan T, Smith JL. Research on the Internet: validation of a World-Wide Web mediated personality scale. *Behav Res Methods Instrum Comput*. 1999; **31**: 565-571.
27. Nathanson AT, Reinert SE. Windsurfing injuries: results of a paper- and Internet-based survey. *Wilderness Environ Med*. 1999; **10**: 218-225.
28. Senior C, Phillips ML, Barnes J, David AS. An investigation into the perception of dominance from schematic faces: a study using the World-Wide Web. *Behav Res Methods Instrum Comput*. 1999; **31**: 341-346.

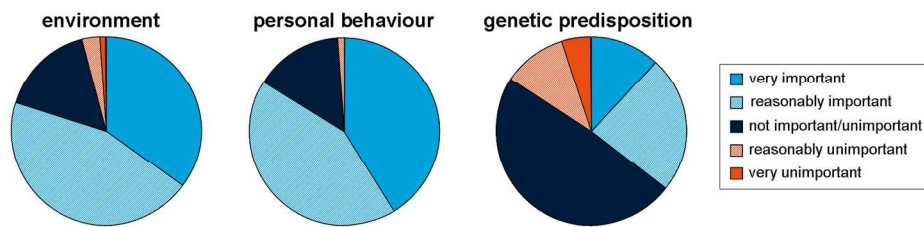

Figure S1: Perceived importance of environment, personal behavior and genetic predisposition as a cause for smoking  
170x40mm (300 x 300 DPI)

peer review only

1  
2  
3  
4  
5  
6  
7  
8  
9  
10  
11  
12  
13  
14  
15  
16  
17  
18  
19  
20  
21  
22  
23  
24  
25  
26  
27  
28  
29  
30  
31  
32  
33  
34  
35  
36  
37  
38  
39  
40  
41  
42  
43  
44  
45  
46  
47  
48  
49  
50  
51  
52  
53  
54  
55  
56  
57  
58  
59  
60

1  
2  
3  
4  
5  
6  
7  
8  
9  
10  
11  
12  
13  
14  
15  
16  
17  
18  
19  
20  
21  
22  
23  
24  
25  
26  
27  
28  
29  
30  
31  
32  
33  
34  
35  
36  
37  
38  
39  
40  
41  
42  
43  
44  
45  
46  
47  
48  
49  
50  
51  
52  
53  
54  
55  
56  
57  
58  
59  
60

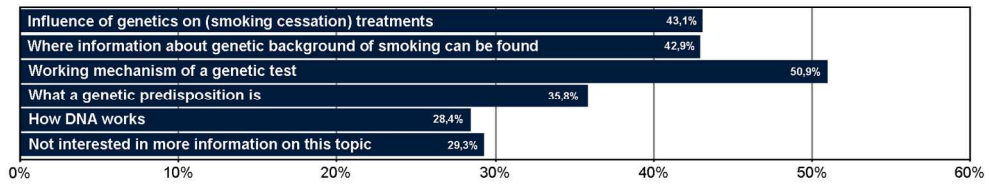

Figure S2-A: Topics of interest  
170x34mm (300 x 300 DPI)

For peer review only

1  
2  
3  
4  
5  
6  
7  
8  
9  
10  
11  
12  
13  
14  
15  
16  
17  
18  
19  
20  
21  
22  
23  
24  
25  
26  
27  
28  
29  
30  
31  
32  
33  
34  
35  
36  
37  
38  
39  
40  
41  
42  
43  
44  
45  
46  
47  
48  
49  
50  
51  
52  
53  
54  
55  
56  
57  
58  
59  
60

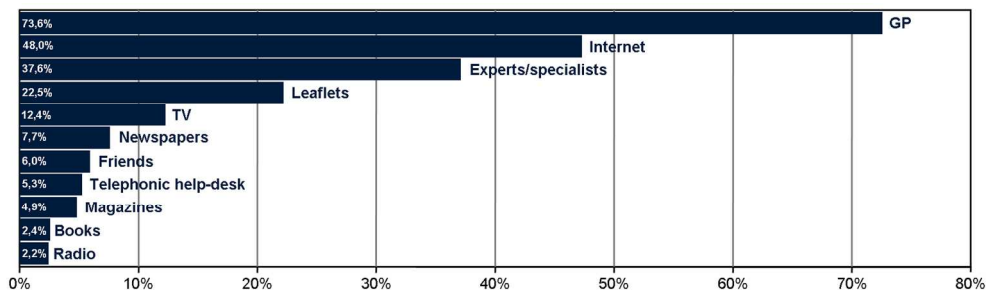

Figure S2-B: Channels of interest for obtaining more information  
170x51mm (300 x 300 DPI)

peer review only



1  
2  
3  
4  
5  
6  
7  
8  
9  
10  
11  
12  
13  
14  
15  
16  
17  
18  
19  
20  
21  
22  
23  
24  
25  
26  
27  
28  
29  
30  
31  
32  
33  
34  
35  
36  
37  
38  
39  
40  
41  
42  
43  
44  
45  
46  
47  
48  
49  
50  
51  
52  
53  
54  
55  
56  
57  
58  
59  
60

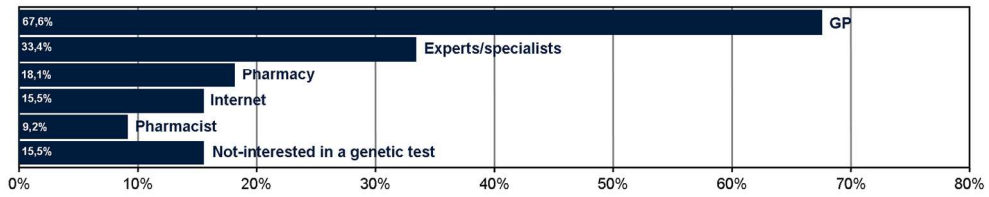

Figure S2-C: Channels of interest for obtaining genetic test  
170x36mm (300 x 300 DPI)

Or peer review only

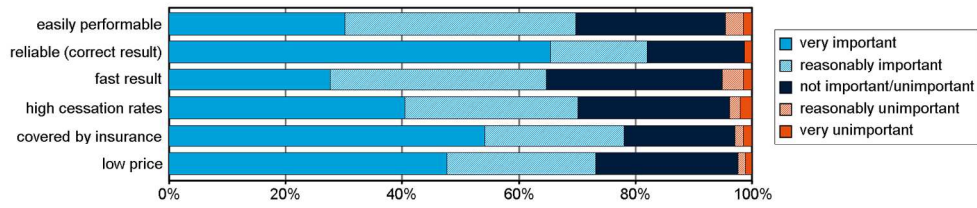

Figure S3: Test characteristics  
170x37mm (300 x 300 DPI)

Or peer review only

1  
2  
3  
4  
5  
6  
7  
8  
9  
10  
11  
12  
13  
14  
15  
16  
17  
18  
19  
20  
21  
22  
23  
24  
25  
26  
27  
28  
29  
30  
31  
32  
33  
34  
35  
36  
37  
38  
39  
40  
41  
42  
43  
44  
45  
46  
47  
48  
49  
50  
51  
52  
53  
54  
55  
56  
57  
58  
59  
60

STROBE 2007 (v4) checklist of items to be included in reports of observational studies in epidemiology\*  
Checklist for cohort, case-control, and cross-sectional studies (combined)

| Section/Topic             | Item # | Recommendation                                                                                                                                                                                                                                                                                                                                                                                                                                                         | Reported on page # |
|---------------------------|--------|------------------------------------------------------------------------------------------------------------------------------------------------------------------------------------------------------------------------------------------------------------------------------------------------------------------------------------------------------------------------------------------------------------------------------------------------------------------------|--------------------|
| Title and abstract        | 1      | (a) Indicate the study’s design with a commonly used term in the title or the abstract                                                                                                                                                                                                                                                                                                                                                                                 | 1,2                |
|                           |        | (b) Provide in the abstract an informative and balanced summary of what was done and what was found                                                                                                                                                                                                                                                                                                                                                                    | 2,3                |
| <b>Introduction</b>       |        |                                                                                                                                                                                                                                                                                                                                                                                                                                                                        |                    |
| Background/rationale      | 2      | Explain the scientific background and rationale for the investigation being reported                                                                                                                                                                                                                                                                                                                                                                                   | 4                  |
| Objectives                | 3      | State specific objectives, including any pre-specified hypotheses                                                                                                                                                                                                                                                                                                                                                                                                      | 4                  |
| <b>Methods</b>            |        |                                                                                                                                                                                                                                                                                                                                                                                                                                                                        |                    |
| Study design              | 4      | Present key elements of study design early in the paper                                                                                                                                                                                                                                                                                                                                                                                                                | 5                  |
| Setting                   | 5      | Describe the setting, locations, and relevant dates, including periods of recruitment, exposure, follow-up, and data collection                                                                                                                                                                                                                                                                                                                                        | not applicable     |
| Participants              | 6      | (a) <i>Cohort study</i> —Give the eligibility criteria, and the sources and methods of selection of participants. Describe methods of follow-up<br><i>Case-control study</i> —Give the eligibility criteria, and the sources and methods of case ascertainment and control selection. Give the rationale for the choice of cases and controls<br><i>Cross-sectional study</i> —Give the eligibility criteria, and the sources and methods of selection of participants | 5                  |
|                           |        | (b) <i>Cohort study</i> —For matched studies, give matching criteria and number of exposed and unexposed<br><i>Case-control study</i> —For matched studies, give matching criteria and the number of controls per case                                                                                                                                                                                                                                                 | not applicable     |
| Variables                 | 7      | Clearly define all outcomes, exposures, predictors, potential confounders, and effect modifiers. Give diagnostic criteria, if applicable                                                                                                                                                                                                                                                                                                                               | 5-6                |
| Data sources/ measurement | 8*     | For each variable of interest, give sources of data and details of methods of assessment (measurement). Describe comparability of assessment methods if there is more than one group                                                                                                                                                                                                                                                                                   | 5-6                |
| Bias                      | 9      | Describe any efforts to address potential sources of bias                                                                                                                                                                                                                                                                                                                                                                                                              | 14                 |
| Study size                | 10     | Explain how the study size was arrived at                                                                                                                                                                                                                                                                                                                                                                                                                              | 5                  |
| Quantitative variables    | 11     | Explain how quantitative variables were handled in the analyses. If applicable, describe which groupings were chosen and why                                                                                                                                                                                                                                                                                                                                           | not applicable     |
| Statistical methods       | 12     | (a) Describe all statistical methods, including those used to control for confounding                                                                                                                                                                                                                                                                                                                                                                                  | not applicable     |
|                           |        | (b) Describe any methods used to examine subgroups and interactions                                                                                                                                                                                                                                                                                                                                                                                                    | not applicable     |
|                           |        | (c) Explain how missing data were addressed                                                                                                                                                                                                                                                                                                                                                                                                                            | not applicable     |
|                           |        | (d) <i>Cohort study</i> —If applicable, explain how loss to follow-up was addressed<br><i>Case-control study</i> —If applicable, explain how matching of cases and controls was addressed                                                                                                                                                                                                                                                                              | not applicable     |

|                          |     |                                                                                                                                                                                                              |                |
|--------------------------|-----|--------------------------------------------------------------------------------------------------------------------------------------------------------------------------------------------------------------|----------------|
|                          |     | <i>Cross-sectional study</i> —If applicable, describe analytical methods taking account of sampling strategy                                                                                                 |                |
|                          |     | (e) Describe any sensitivity analyses                                                                                                                                                                        | not applicable |
| <b>Results</b>           |     |                                                                                                                                                                                                              |                |
| Participants             | 13* | (a) Report numbers of individuals at each stage of study—eg numbers potentially eligible, examined for eligibility, confirmed eligible, included in the study, completing follow-up, and analysed            | 5              |
|                          |     | (b) Give reasons for non-participation at each stage                                                                                                                                                         | 5              |
|                          |     | (c) Consider use of a flow diagram                                                                                                                                                                           | x              |
| Descriptive data         | 14* | (a) Give characteristics of study participants (eg demographic, clinical, social) and information on exposures and potential confounders                                                                     | 7              |
|                          |     | (b) Indicate number of participants with missing data for each variable of interest                                                                                                                          | not applicable |
|                          |     | (c) <i>Cohort study</i> —Summarise follow-up time (eg, average and total amount)                                                                                                                             | x              |
| Outcome data             | 15* | <i>Cohort study</i> —Report numbers of outcome events or summary measures over time                                                                                                                          | x              |
|                          |     | <i>Case-control study</i> —Report numbers in each exposure category, or summary measures of exposure                                                                                                         | x              |
|                          |     | <i>Cross-sectional study</i> —Report numbers of outcome events or summary measures                                                                                                                           | 7-11           |
| Main results             | 16  | (a) Give unadjusted estimates and, if applicable, confounder-adjusted estimates and their precision (eg, 95% confidence interval). Make clear which confounders were adjusted for and why they were included | not applicable |
|                          |     | (b) Report category boundaries when continuous variables were categorized                                                                                                                                    | 7-11           |
|                          |     | (c) If relevant, consider translating estimates of relative risk into absolute risk for a meaningful time period                                                                                             | not applicable |
| Other analyses           | 17  | Report other analyses done—eg analyses of subgroups and interactions, and sensitivity analyses                                                                                                               | not applicable |
| <b>Discussion</b>        |     |                                                                                                                                                                                                              |                |
| Key results              | 18  | Summarise key results with reference to study objectives                                                                                                                                                     | 12-15          |
| Limitations              | 19  | Discuss limitations of the study, taking into account sources of potential bias or imprecision. Discuss both direction and magnitude of any potential bias                                                   | 13-14          |
| Interpretation           | 20  | Give a cautious overall interpretation of results considering objectives, limitations, multiplicity of analyses, results from similar studies, and other relevant evidence                                   | 12-15          |
| Generalisability         | 21  | Discuss the generalisability (external validity) of the study results                                                                                                                                        | 15             |
| <b>Other information</b> |     |                                                                                                                                                                                                              |                |
| Funding                  | 22  | Give the source of funding and the role of the funders for the present study and, if applicable, for the original study on which the present article is based                                                | 15             |

\*Give information separately for cases and controls in case-control studies and, if applicable, for exposed and unexposed groups in cohort and cross-sectional studies.

**Note:** An Explanation and Elaboration article discusses each checklist item and gives methodological background and published examples of transparent reporting. The STROBE checklist is best used in conjunction with this article (freely available on the Web sites of PLoS Medicine at <http://www.plosmedicine.org/>, Annals of Internal Medicine at <http://www.annals.org/>, and Epidemiology at <http://www.epidem.com/>). Information on the STROBE Initiative is available at [www.strobe-statement.org](http://www.strobe-statement.org).
